# Supplementary material for: Oxygen-induced defects at the lead halide perovskite/graphene oxide interfaces
Source: Royal Society of Chemistry journal article supplement (doi:10.1039/c7ta10010h), 2017-12-21
Supplement: c7ta10010h1.pdf [file c7ta10010h1.pdf]

# Oxygen-Induced Defects at the Lead Halide Perovskite/Graphene Oxide Interfaces

Muge Acik,<sup>a,\*</sup> In Kee Park,<sup>b</sup> Rachel E. Koritala,<sup>a</sup> Geunsik Lee,<sup>b</sup> Richard A. Rosenberg<sup>c</sup>

<sup>a</sup>Center for Nanoscale Materials, Argonne National Laboratory, Lemont, IL 60439

<sup>b</sup>Department of Chemistry, Ulsan National Institute of Science and Technology, Ulsan, Korea  
689-798

<sup>c</sup>Advanced Photon Source, X-ray Science Division, Argonne National Laboratory, Lemont, IL  
60439

\*Corresponding Author: [macik@anl.gov](mailto:macik@anl.gov)

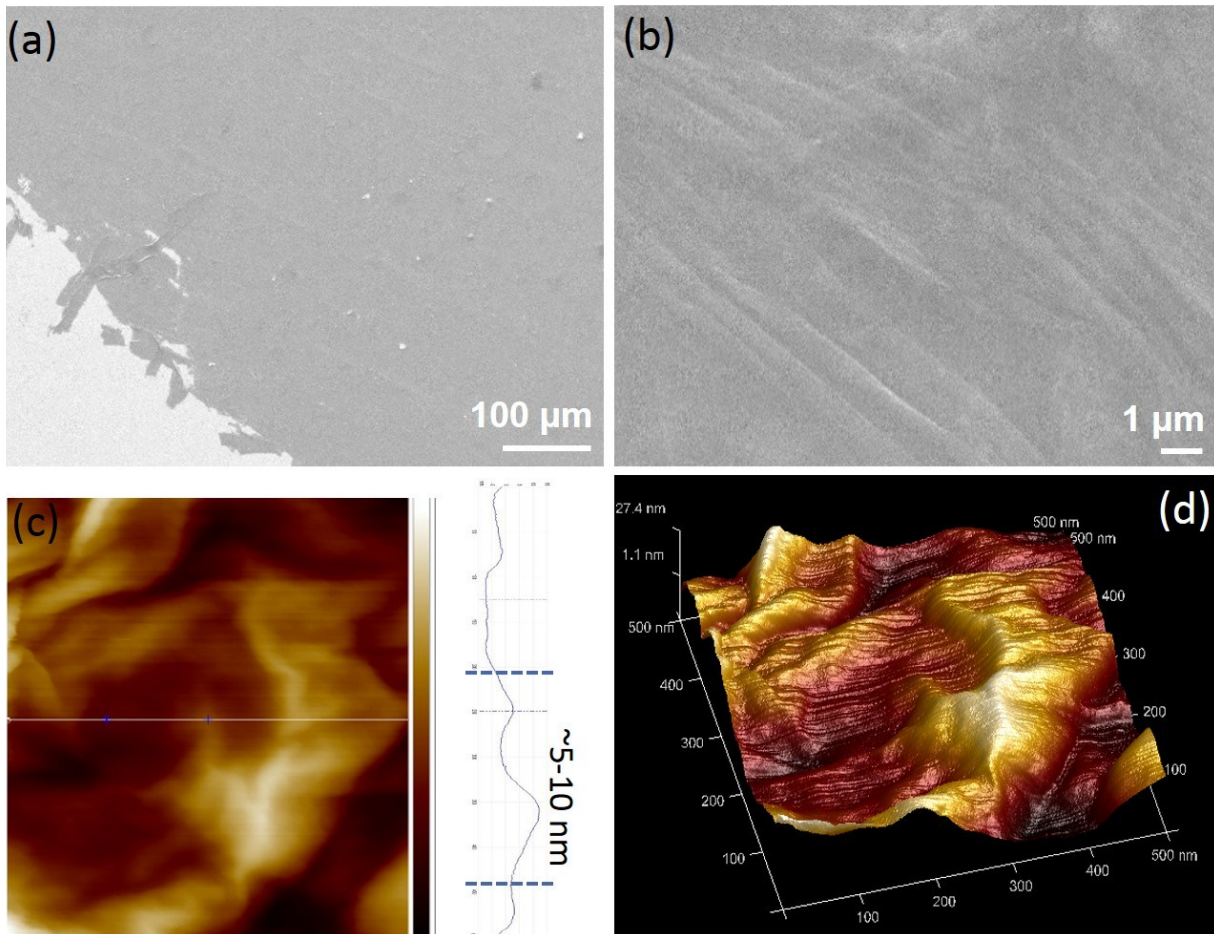

**Figure S1.** a) Top-down SEM image of a continuous GO (3-5 layers) thin film with natural wrinkles and ripples as shown with a high magnification image in (b). The scale bars represent 100  $\mu\text{m}$  and 1  $\mu\text{m}$  in (a)-(b), respectively. c) AFM image of a GO (3-5 L) with a thickness of 5-10 nm, and an average surface roughness of  $R_{\text{max}} \sim 20$  nm shown with a 3D topography (500x500 nm) in (d).

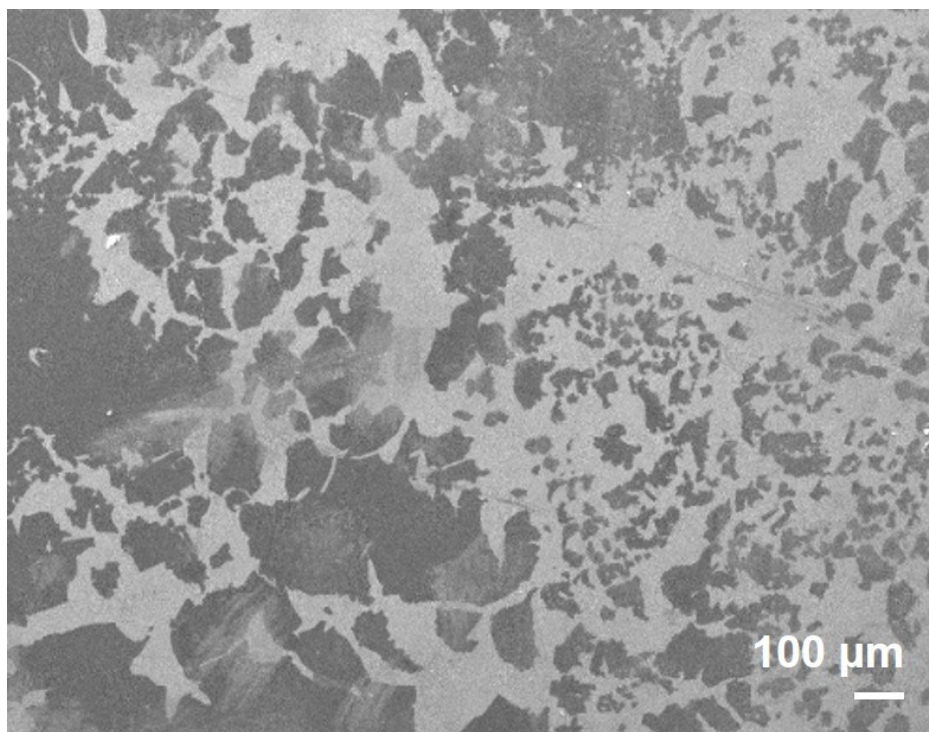

**Figure S2.** Top-down SEM image of GO (1L) thin film with unevenly distributed random flakes on an area scaled by a scale bar of 100  $\mu\text{m}$ .

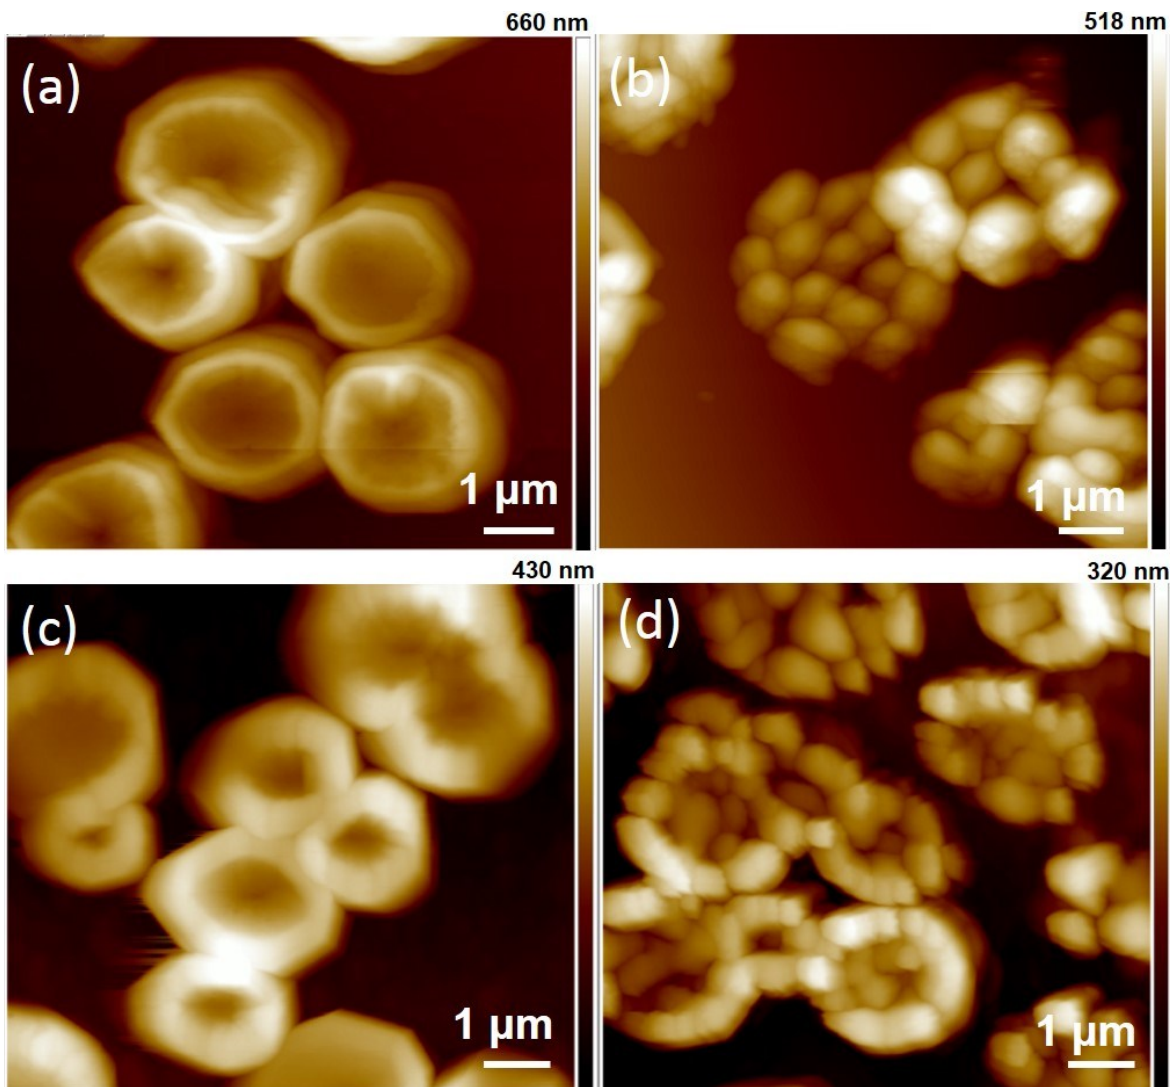

**Figure S3.** AFM images of a) spin casting (40  $\mu\text{l}$  solution at a spin rate of 4000 rpm in 30s) of precursors (MABr and  $\text{PbBr}_2$ ) on a Si/SiO<sub>2</sub> substrate at room temperature, and b) after annealing at 130°C for MAPbBr<sub>3</sub> growth, c) spin casting of MABr and  $\text{PbBr}_2$  on a GO thin film at room temperature, and d) at 130°C. The numbers at the top right corner of each image indicates the height profile measured at the center on a vertical line. Scale bars are given in a 1  $\mu\text{m}$  scale.

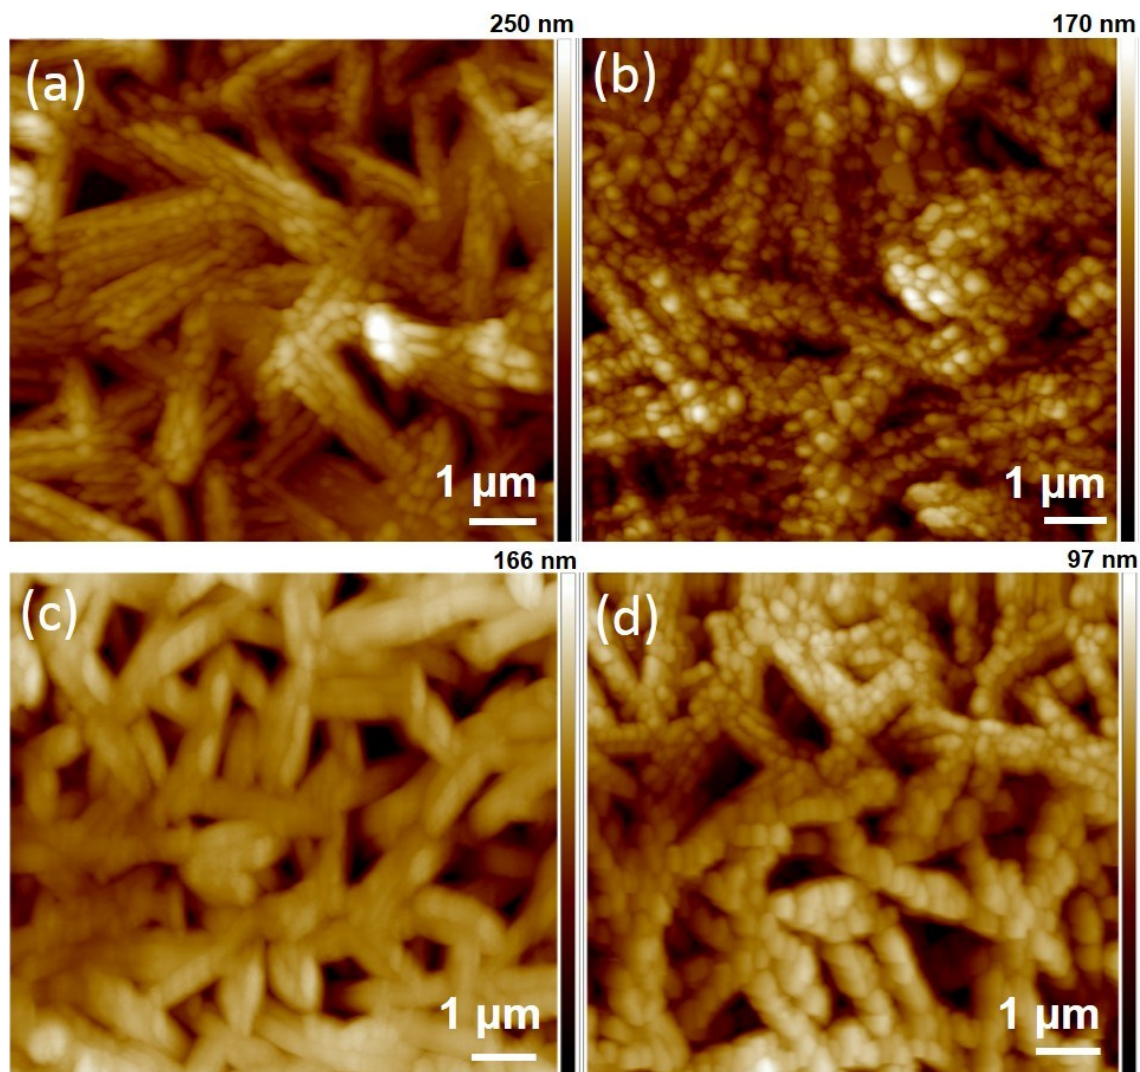

**Figure S4.** AFM images of a) spin casting (40  $\mu\text{l}$  solution at a spin rate of 4000 rpm in 30s) of precursors (MAI and  $\text{PbI}_2$ ) on a  $\text{Si}/\text{SiO}_2$  substrate at room temperature, and b) after annealing at  $130^\circ\text{C}$  for  $\text{MAPbI}_3$  growth, c) spin casting of MAI and  $\text{PbI}_2$  on a GO thin film at room temperature, and d) at  $130^\circ\text{C}$ . The numbers at the top right corner of each image indicates the height profile measured at the center on a vertical line. Scale bars are given in a  $1\mu\text{m}$  scale.

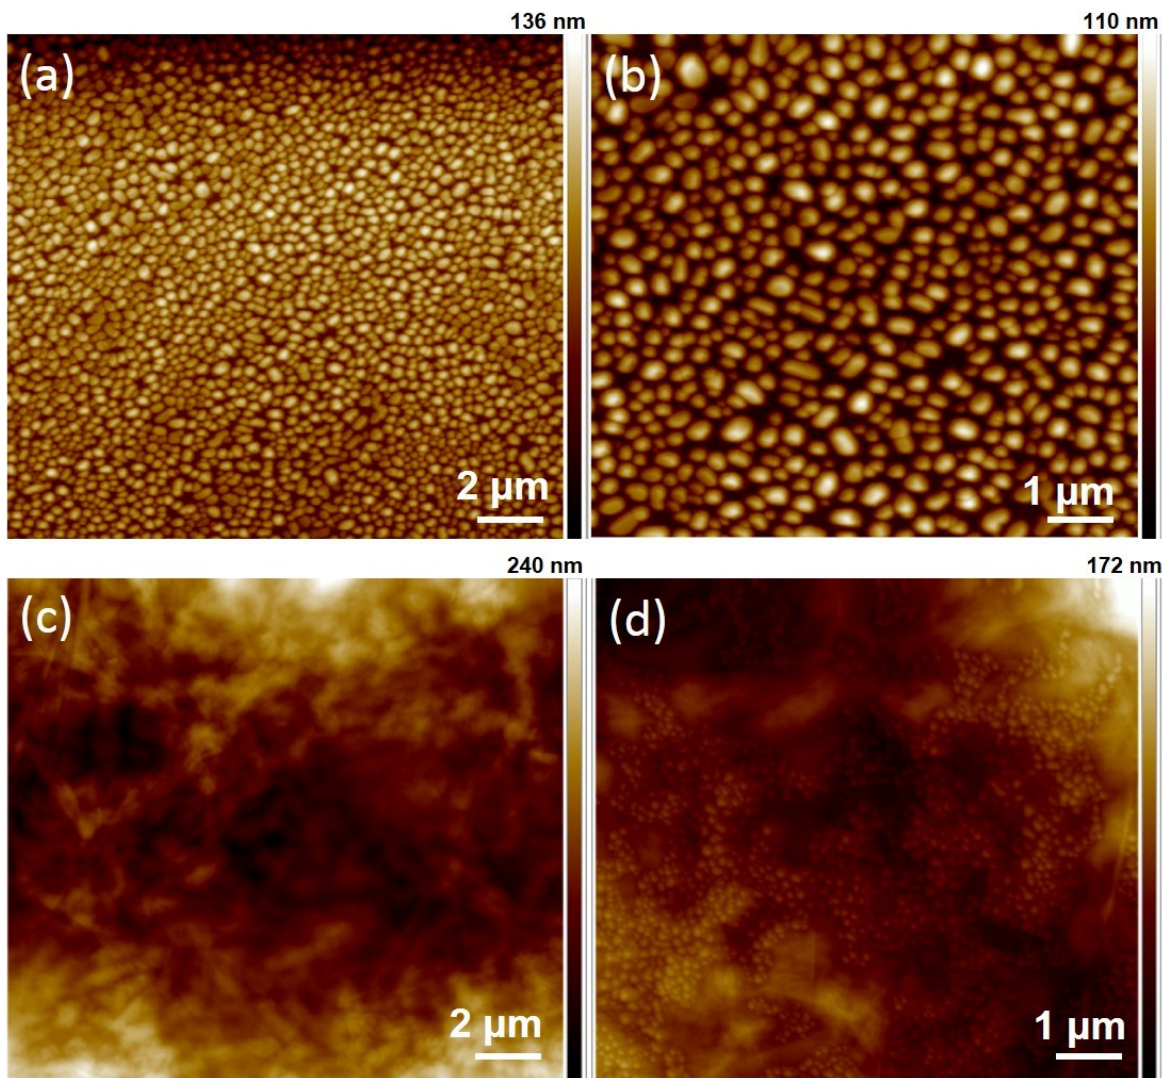

**Figure S5.** AFM images of a) spin casting (40  $\mu\text{l}$  solution at a spin rate of 4000 rpm in 30s) of precursors ( $\text{MACl}$  and  $\text{PbCl}_2$ ) on a  $\text{Si/SiO}_2$  substrate at room temperature, and b) after annealing at  $130^\circ\text{C}$  for  $\text{MAPbCl}_3$  growth, c) spin casting of  $\text{MACl}$  and  $\text{PbCl}_2$  on a GO thin film for  $\text{MAPbCl}_3$  growth on GO at room temperature, and d) at  $130^\circ\text{C}$ . The numbers at the top right corner of each image indicate the height profile measured at the center on a vertical line. Scale bars are given in a 1-2  $\mu\text{m}$  scale.

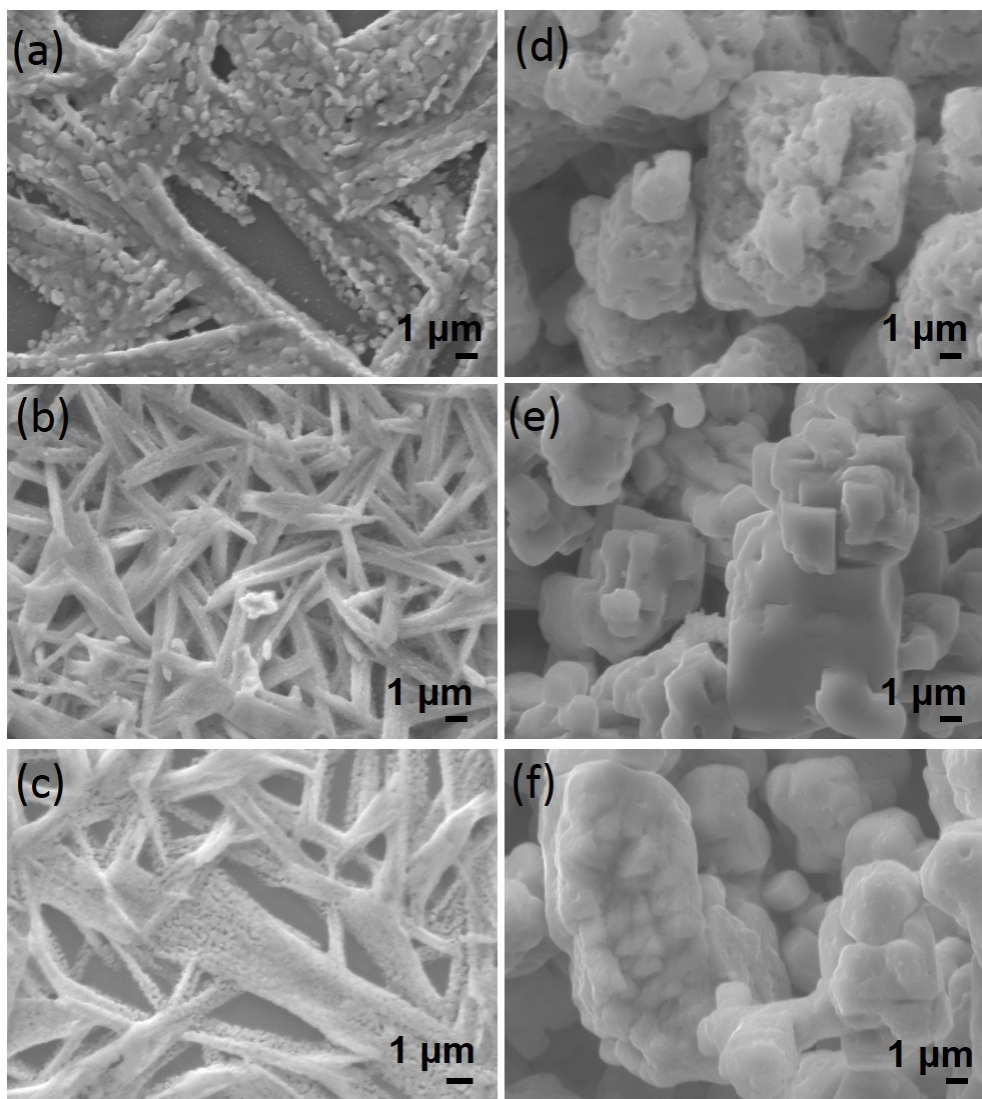

**Figure S6.** SEM images of MAPbI<sub>3</sub> a) after spin coating of precursors on a Si/SiO<sub>2</sub> substrate at 130°C, b) after of spin-coated precursors of MAI and PbI<sub>2</sub> on a GO (3-5 layers) thin film at room temperature, and c) after annealing at 130°C for MAPbI<sub>3</sub> growth on GO. SEM images of MAPbCl<sub>3</sub> d) after spin coating of the precursors on a Si/SiO<sub>2</sub> substrate at 130°C, e) spin-coated precursors of MAI and PbI<sub>2</sub> on a GO (3-5 layers) thin film at room temperature, and f) after annealing at 130°C for MAPbCl<sub>3</sub> growth on GO. The scale bars for each SEM image indicates 1 μm.

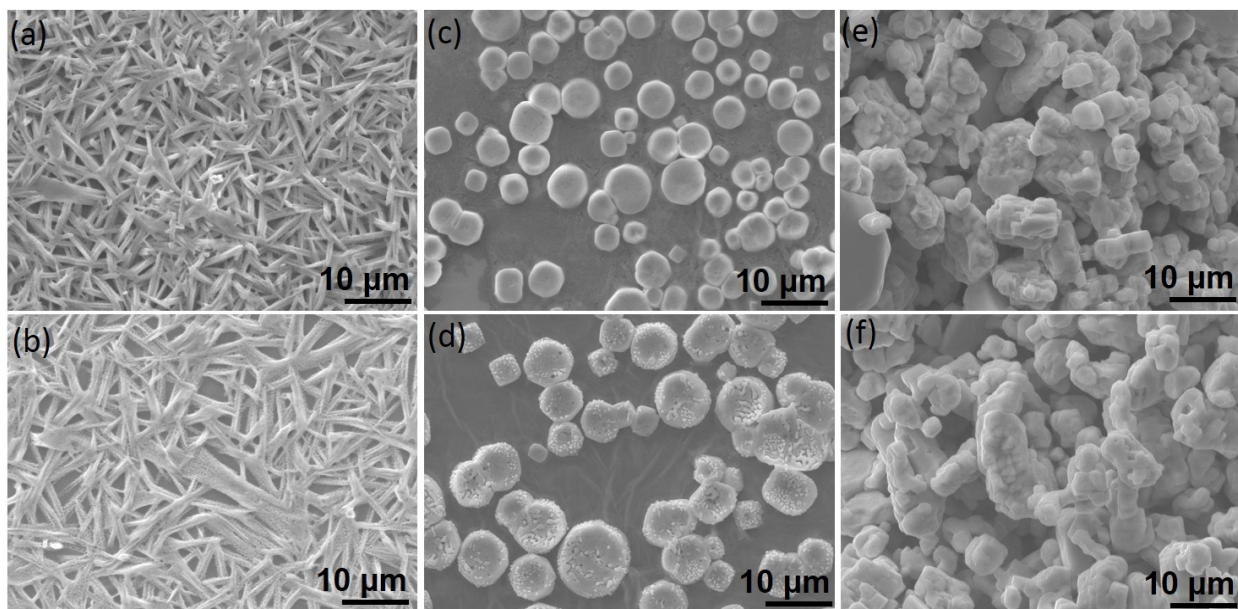

**Figure S7.** SEM images of MAPbI<sub>3</sub> (a-b), MAPbBr<sub>3</sub> (c-d), and MAPbCl<sub>3</sub> (e-f) crystals grown at 130°C on a) Si/SiO<sub>2</sub> and b) GO (3-5L), respectively. Scale bars indicate a scale of 10 μm.



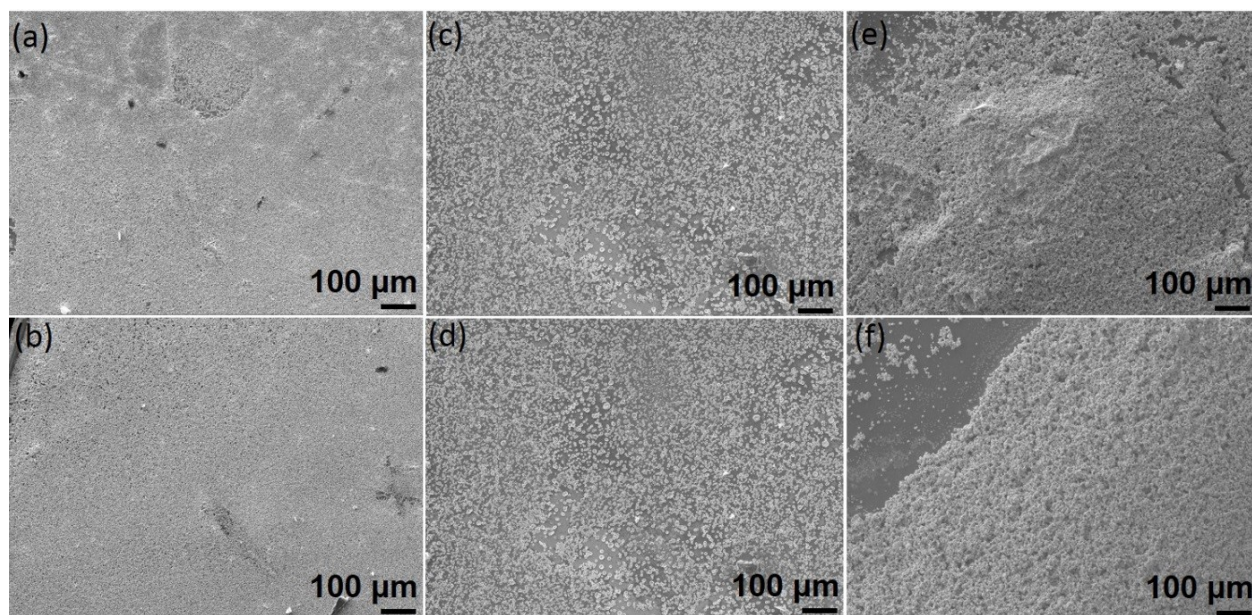

**Figure S8.** SEM images of MAPbI<sub>3</sub> (a-b), MAPbBr<sub>3</sub> (c-d), and MAPbCl<sub>3</sub> (e-f) crystals grown at 130°C on a) Si/SiO<sub>2</sub> and b) GO (3-5L), respectively. Scale bars indicate a scale of 100 μm.

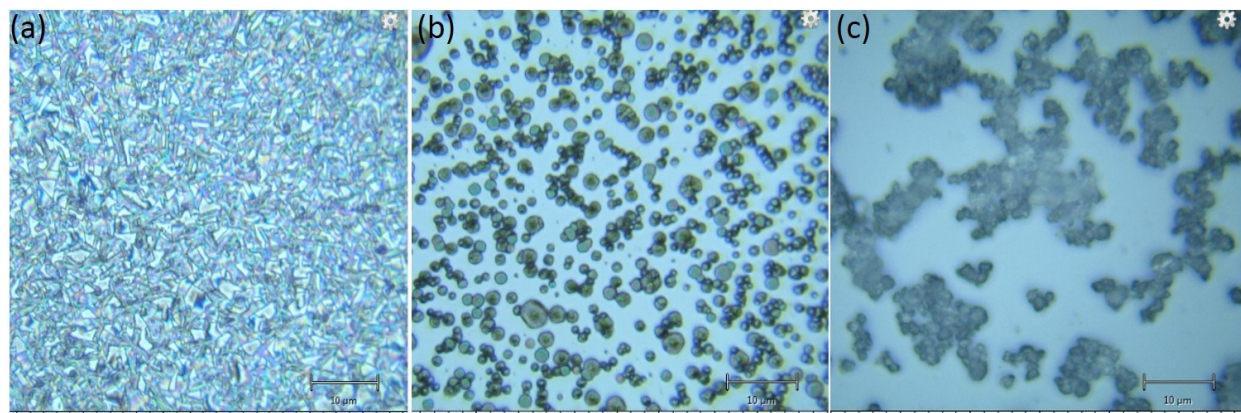

**Figure S9.** Optical microscope images of a)  $\text{MAPbI}_3$ , b)  $\text{MAPbBr}_3$ , and c)  $\text{MAPbCl}_3$  crystals grown at  $130^\circ\text{C}$  on  $\text{Si}/\text{SiO}_2$ . Scale bars indicate a scale of  $10\ \mu\text{m}$ .

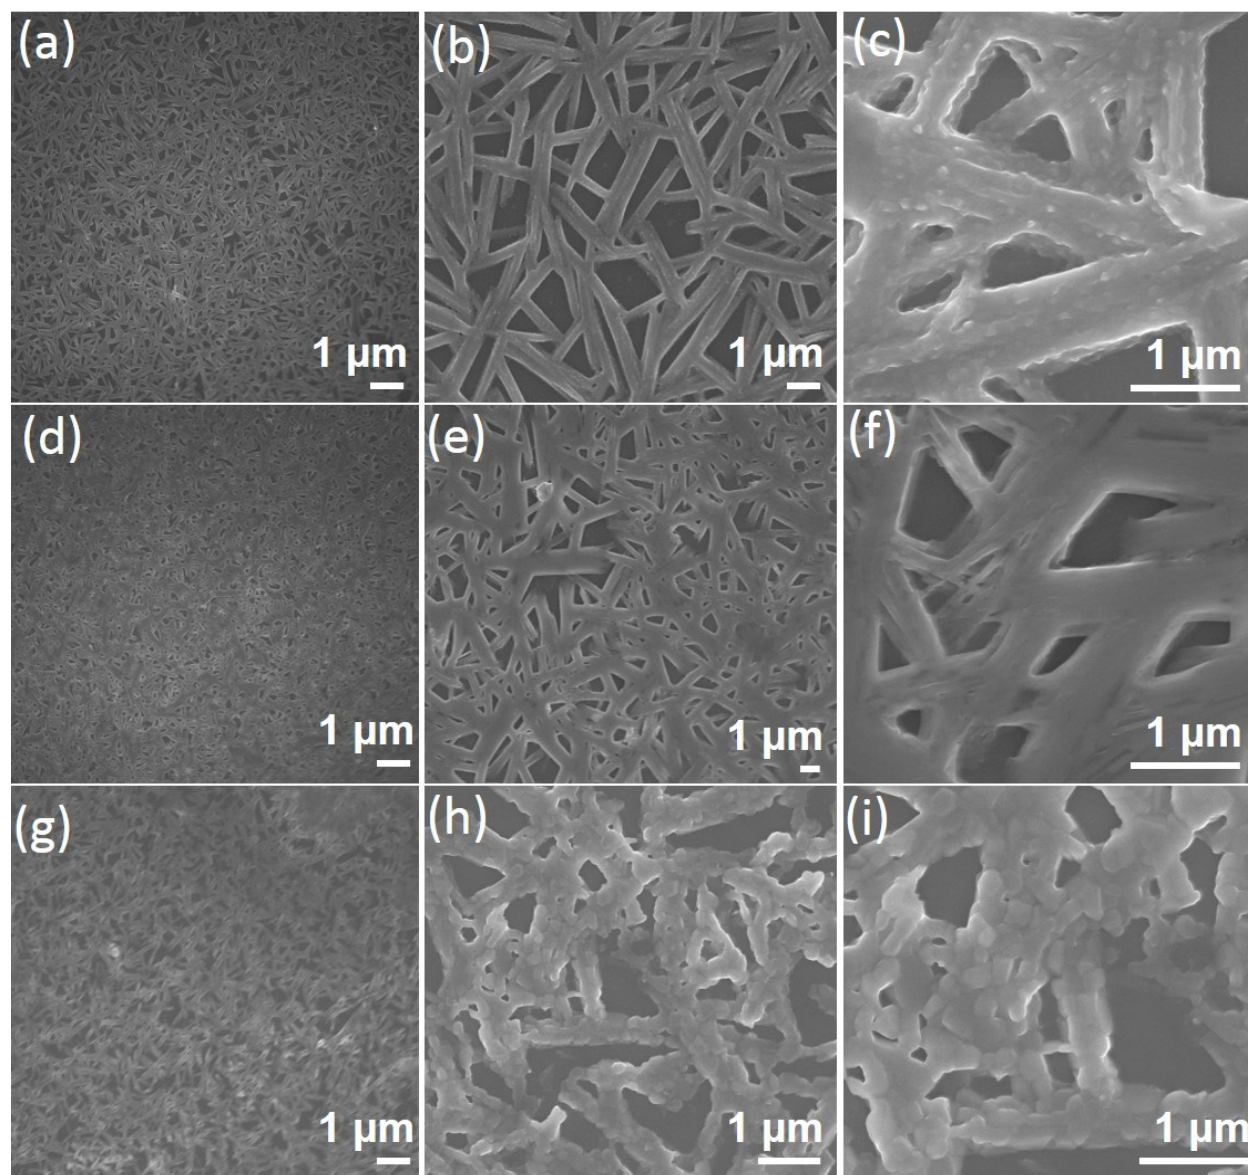

**Figure S10.** Top-down SEM images of MAPbI<sub>3</sub> crystals spin coated on a Si/SiO<sub>2</sub> from a DMF solution and further annealed for 2h (a-c), 6h (d-f), and 12h (g-i) at 60°C, as shown with images from low to high magnification (left to right).

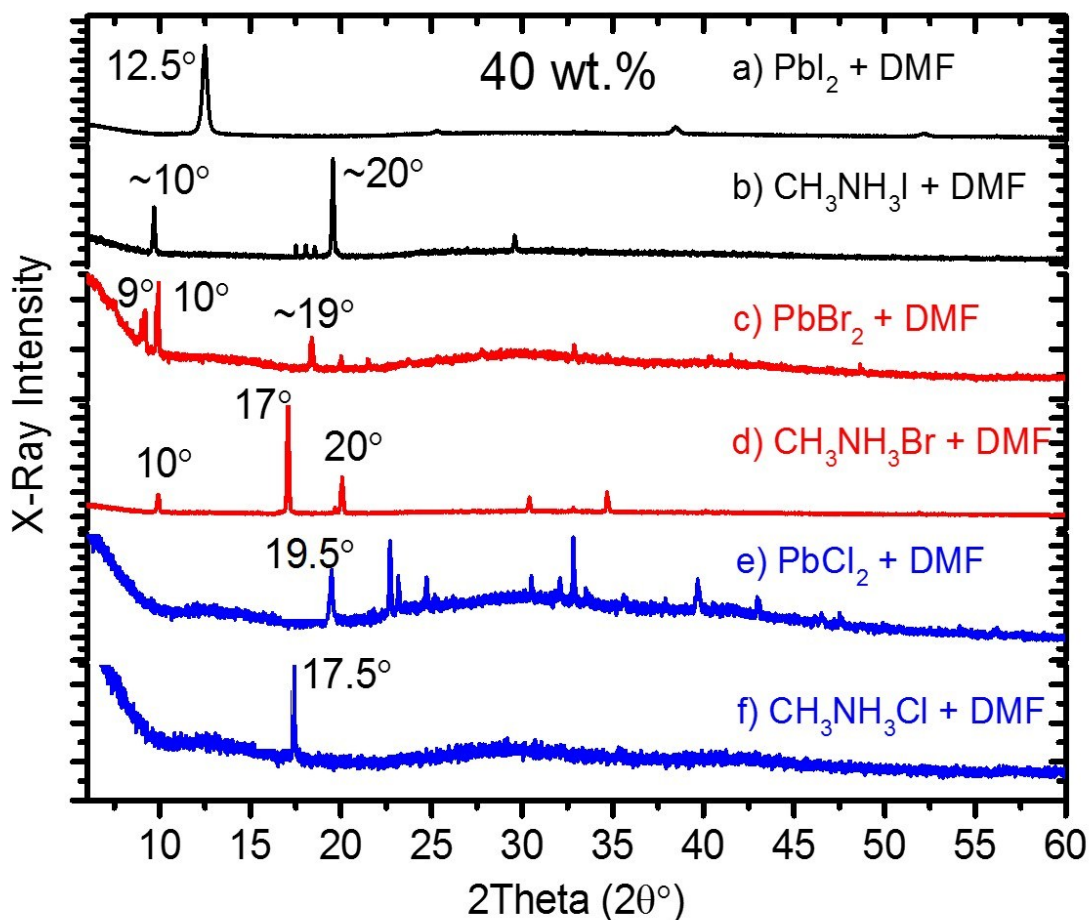

**Figure S11.** X-ray diffraction pattern of the precursors, namely  $\text{PbI}_2$  (a) and  $\text{CH}_3\text{NH}_3\text{I}$  (b) spin coated in DMF (0.1g/ml) on a  $\text{Si}/\text{SiO}_2$  substrate for  $\text{MAPbI}_3$  growth. X-ray diffraction pattern of the precursors, namely  $\text{PbBr}_2$  (c) and  $\text{CH}_3\text{NH}_3\text{Br}$  (d) spin coated in DMF (0.1g/ml) on a  $\text{Si}/\text{SiO}_2$  substrate for  $\text{MAPbBr}_3$  growth. X-ray diffraction pattern of the precursors, namely  $\text{PbCl}_2$  (a) and  $\text{CH}_3\text{NH}_3\text{Cl}$  (b) spin coated in DMF (0.1g/ml) on a  $\text{Si}/\text{SiO}_2$  substrate for  $\text{MAPbCl}_3$  growth.

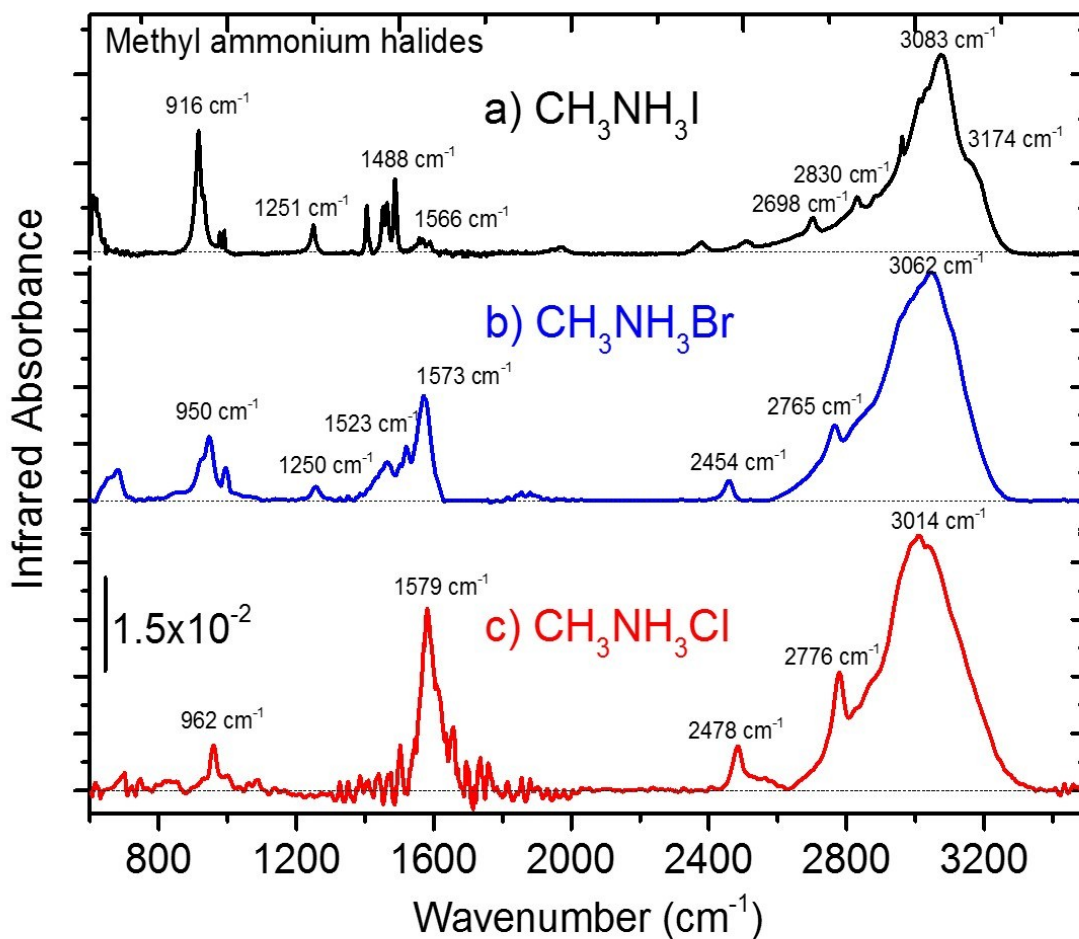

**Figure S12.** Infrared absorbance spectra of a)  $\text{CH}_3\text{NH}_3\text{I}$ , b)  $\text{CH}_3\text{NH}_3\text{Br}$ , and c)  $\text{CH}_3\text{NH}_3\text{Cl}$  spin coated in in DMF (0.1 g/ml) on a Si/SiO<sub>2</sub> substrate, and referenced to infrared absorbance spectrum of a bare Si/SiO<sub>2</sub> for background subtraction.

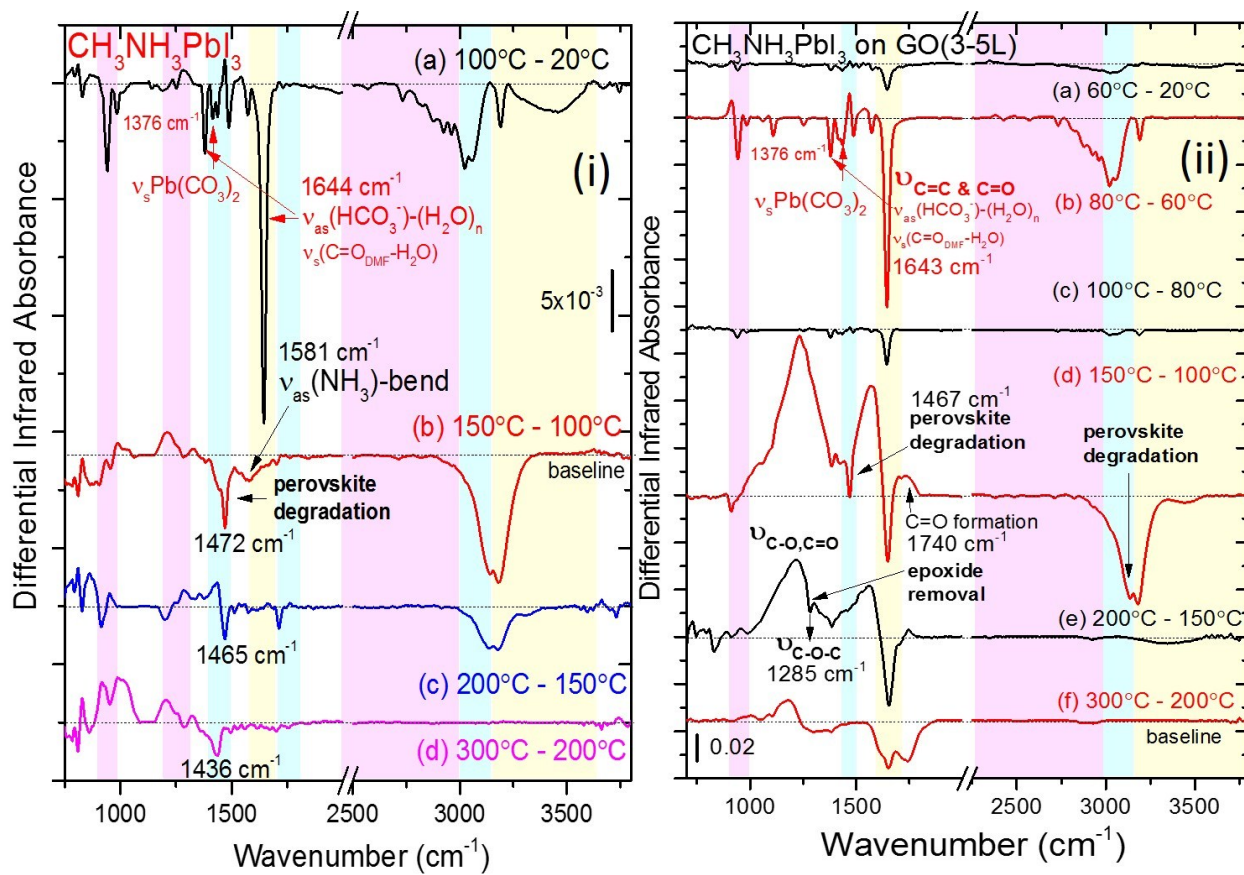

**Figure S13.** *In situ* differential infrared absorbance spectra of MAPbI<sub>3</sub> growth on i) Si/SiO<sub>2</sub> at a) 20-100°C, b) 100-150°C, c) 150-200°C, and d) 200-300°C, respectively. MAPbI<sub>3</sub> growth on ii) on a GO (3-5L) thin film at a) 20-60°C, b) 60-80°C, c) 80-100°C, d) 100-150°C, e) 150-200°C, and f) 200-300°C, respectively. Each spectrum is referenced to previous temperature to monitor the growth, and a baseline correction is applied. The baseline is given as the dotted line.

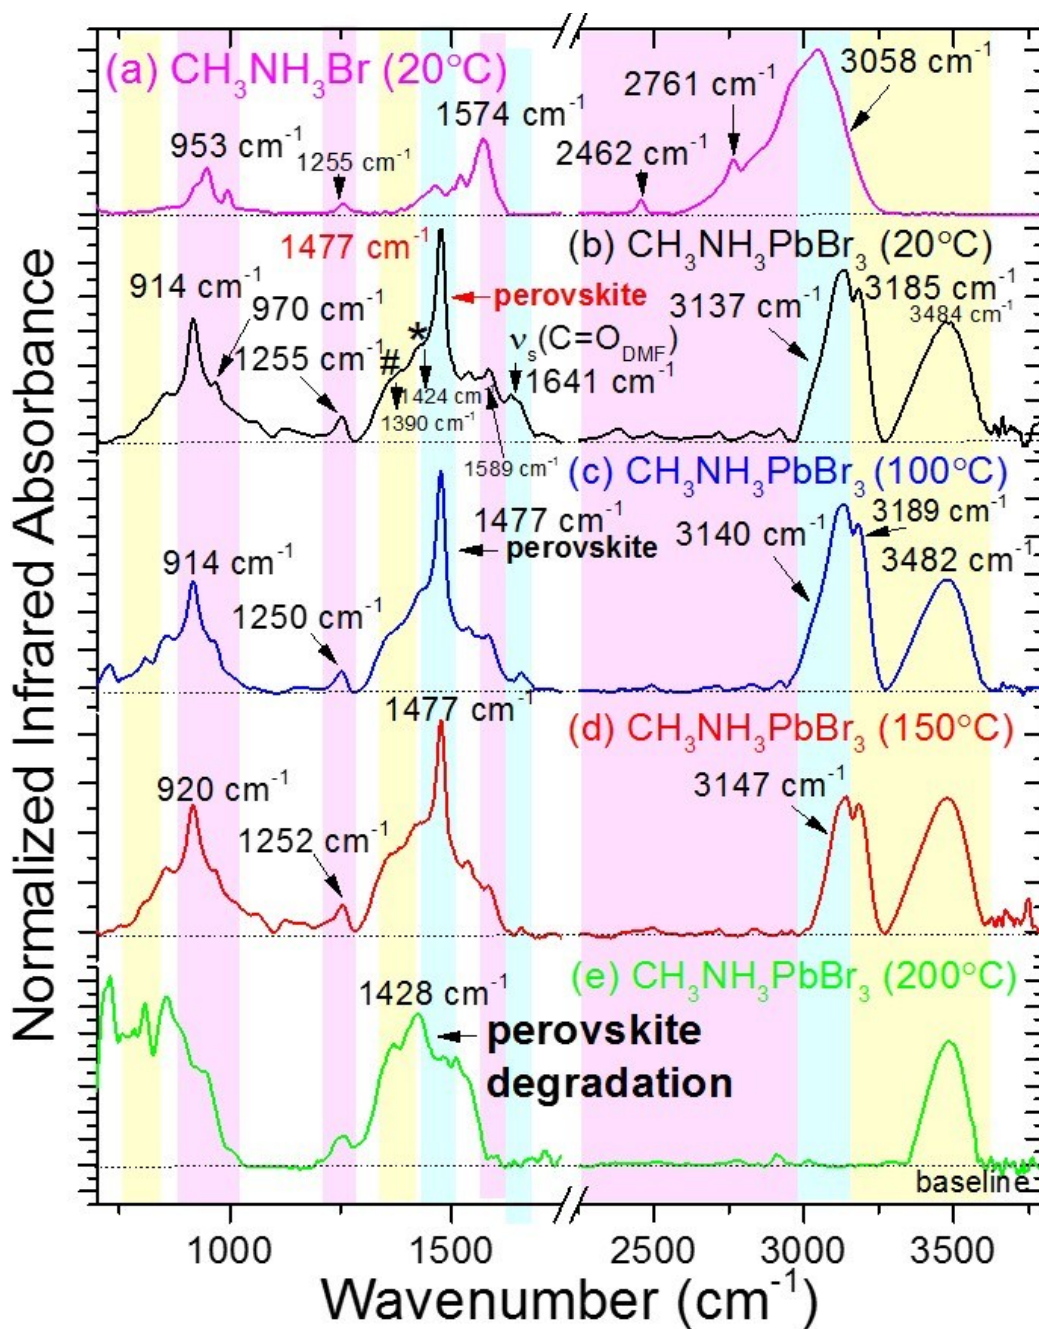

**Figure S14.** *In situ* transmission infrared absorbance spectra of a) spin-casted MABr from a DMF solution on a Si/SiO<sub>2</sub> substrate, b) spin coating of precursors (MABr and PbBr<sub>2</sub>) from a 40 wt.% DMF solution on a Si/SiO<sub>2</sub> at room temperature ( $\sim 20^\circ\text{C}$ ), and after annealing in argon at c)  $100^\circ\text{C}$ , (d)  $150^\circ\text{C}$ , and (e)  $200^\circ\text{C}$  for MAPbBr<sub>3</sub> growth on Si/SiO<sub>2</sub>. The dotted lines indicate a baseline for each of the infrared spectrum obtained after subtracting the infrared spectrum of Si/SiO<sub>2</sub>.

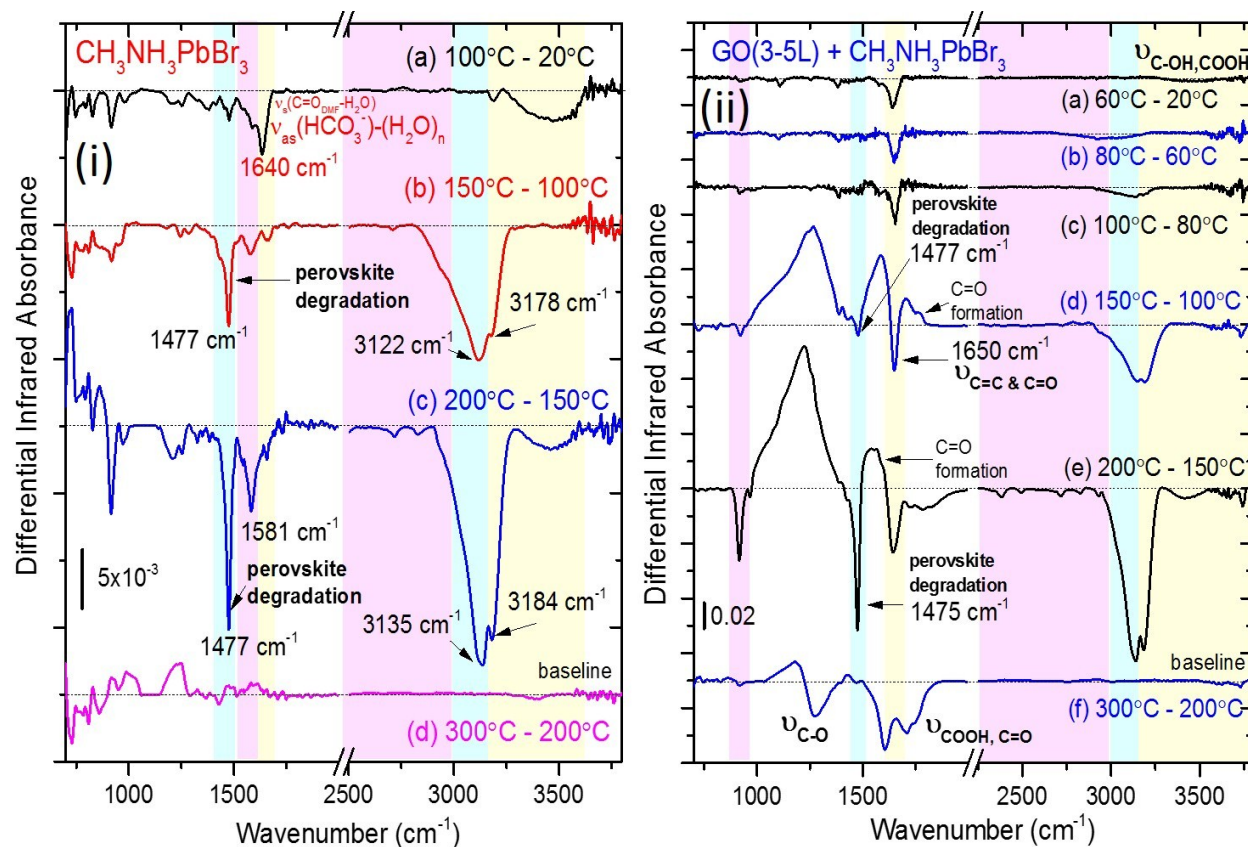

**Figure S15.** *In situ* differential infrared absorbance spectra of MAPbBr<sub>3</sub> growth on i) Si/SiO<sub>2</sub> at a) 20-100°C, b) 100-150°C, c) 150-200°C, and d) 200-300°C, respectively. MAPbBr<sub>3</sub> growth on ii) on a GO (3-5L) thin film at a) 20-60°C, b) 60-80°C, c) 80-100°C, d) 100-150°C, e) 150-200°C, and f) 200-300°C, respectively. Each spectrum is referenced to previous temperature to monitor the growth, and a baseline correction is applied. The baseline is given as the dotted line.



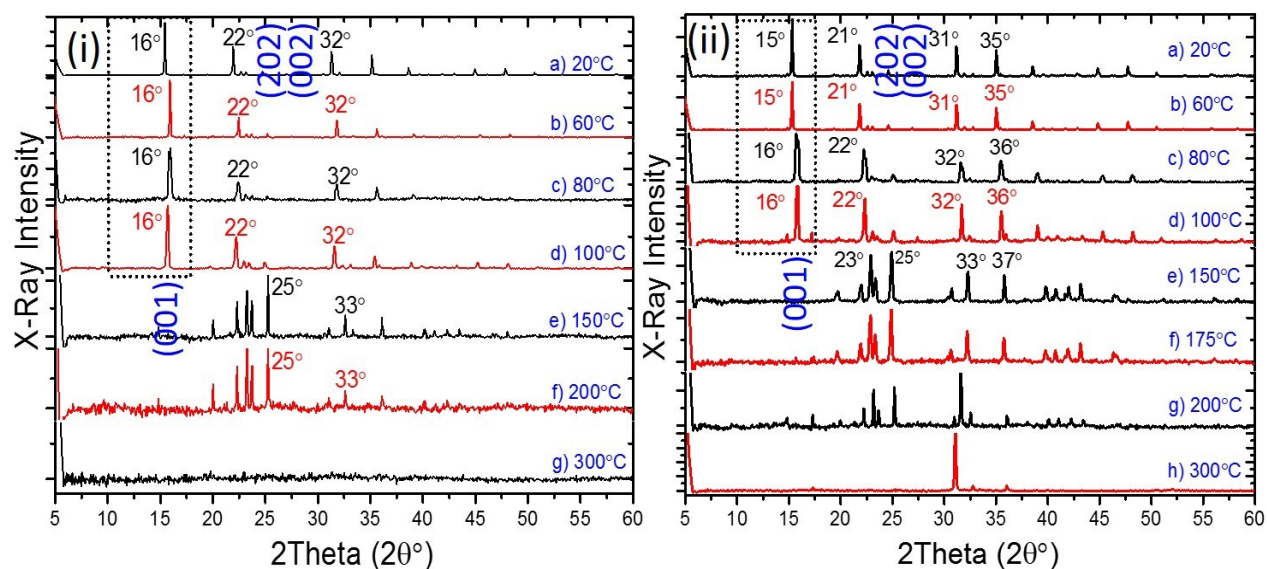

**Figure S16.** X-ray diffraction patterns for the growth of methylammonium lead chloride ( $\text{MAPbCl}_3$ ) spin-coated from a 40  $\mu\text{l}$  of DMF solution (i) on a  $\text{Si/SiO}_2$  substrate at a spin rate of 4000 rpm in 30s a) at room temperature ( $\sim 20^\circ\text{C}$ ), and further annealed on a hot plate at b)  $60^\circ\text{C}$ , c)  $80^\circ\text{C}$ , d)  $100^\circ\text{C}$ , e)  $150^\circ\text{C}$ , f)  $175^\circ\text{C}$ , g)  $200^\circ\text{C}$ , and h)  $300^\circ\text{C}$  for  $\sim 30$  min. in a nitrogen glove box. X-ray diffraction patterns for the growth of methylammonium lead chloride ( $\text{MAPbCl}_3$ ) spin-coated from a 40  $\mu\text{l}$  of DMF solution (ii) on a  $\text{Si/SiO}_2$  substrate at a spin rate of 4000 rpm in 30s a) at room temperature ( $\sim 20^\circ\text{C}$ ), and further annealed on a hot plate at b)  $60^\circ\text{C}$ , c)  $80^\circ\text{C}$ , d)  $100^\circ\text{C}$ , e)  $150^\circ\text{C}$ , f)  $175^\circ\text{C}$ , g)  $200^\circ\text{C}$ , and h)  $300^\circ\text{C}$  for  $\sim 30$  min. in a nitrogen glove box.

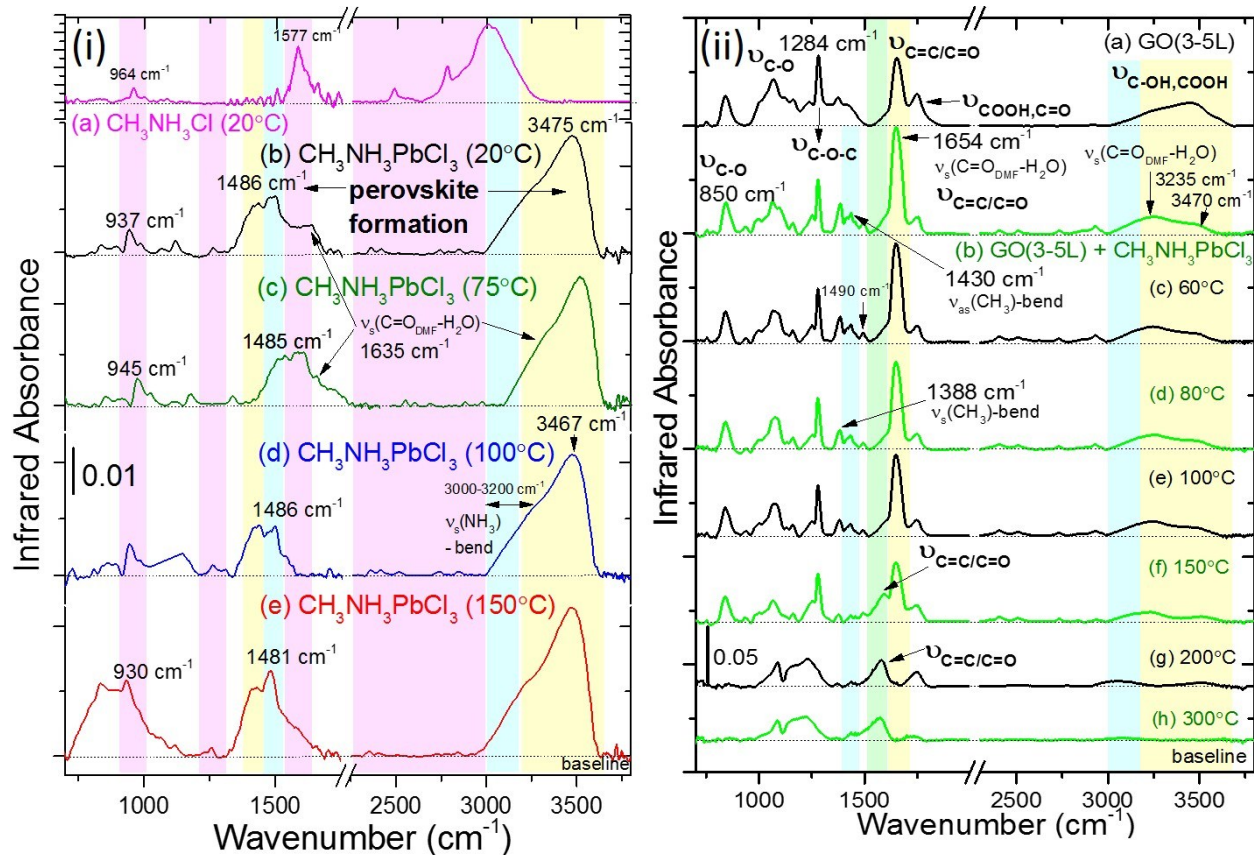

**Figure S17.** (i) *In situ* transmission infrared absorbance spectra of a) spin-casted MACl from a DMF solution on a Si/SiO<sub>2</sub> substrate as a control, b) spin coating of precursors (MACl and PbCl<sub>2</sub>) from a 40 wt.% DMF solution on a Si/SiO<sub>2</sub> at room temperature (~20°C), and after annealing in argon at c) 75°C, (d) 100°C, and (e) 150°C for MAPbCl<sub>3</sub> growth on Si/SiO<sub>2</sub>. (ii) *In situ* transmission infrared absorbance spectra of a) a GO thin film (3-5 layers) deposited on a Si/SiO<sub>2</sub> prior to any perovskite growth, b) spin coating of precursors (MACl and PbCl<sub>2</sub>) from a 40 wt.% DMF solution on GO (a) at room temperature (~20°C), and after annealing in argon at c) 60°C, (d) 80°C, (e) 100°C, (f) 150°C, (g) 200 °C, and (h) 300°C for MAPbCl<sub>3</sub> growth on GO.

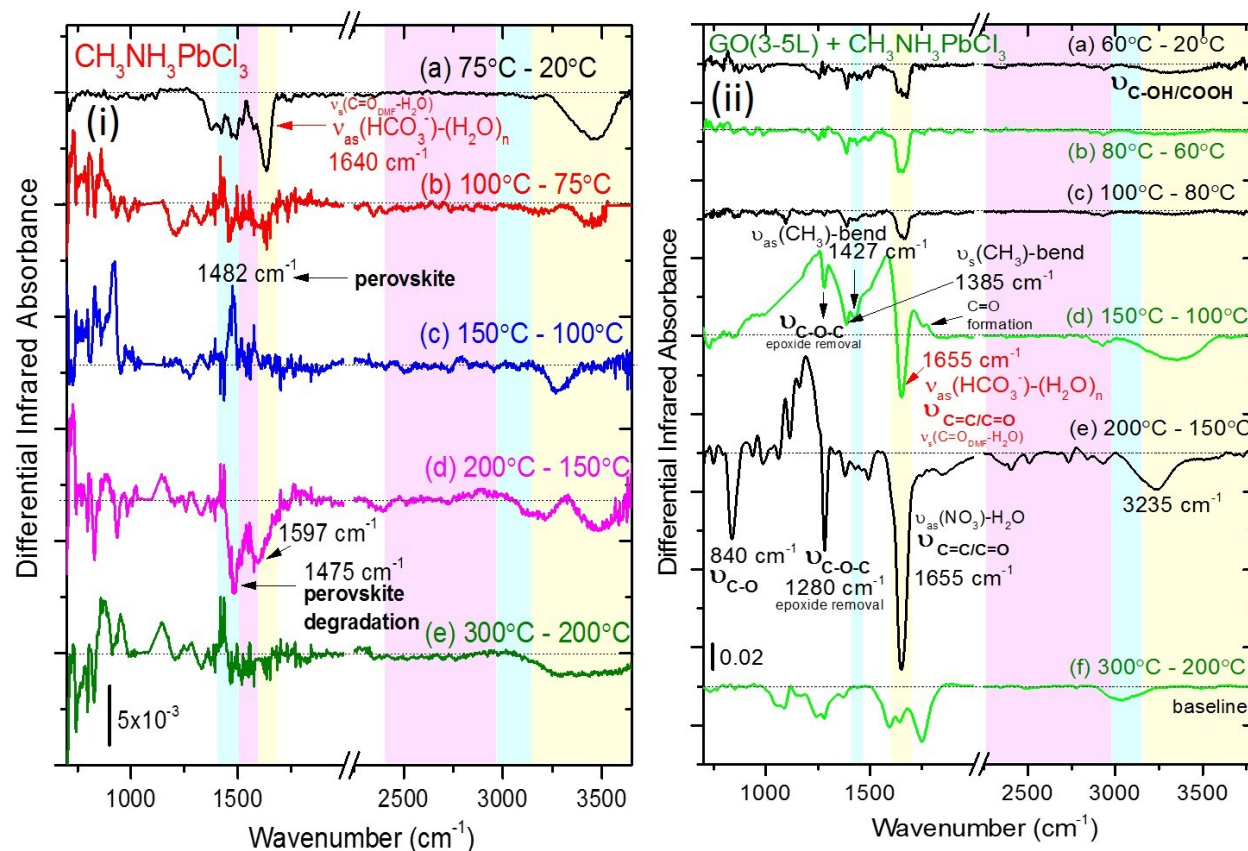

**Figure S18.** *In situ* differential infrared absorbance spectra of MAPbCl<sub>3</sub> growth on i) Si/SiO<sub>2</sub> at a) 20-75°C, b) 75-100°C, c) 100-150°C, d) 150-200°C, and e) 200-300°C, respectively. MAPbCl<sub>3</sub> growth on ii) on a GO (3-5L) thin film at a) 20-60°C, b) 60-80°C, c) 80-100°C, d) 100-150°C, e) 150-200°C, and f) 200-300°C, respectively. Each spectrum is referenced to previous temperature to monitor the growth, and a baseline correction is applied. The baseline is given as the dotted line.

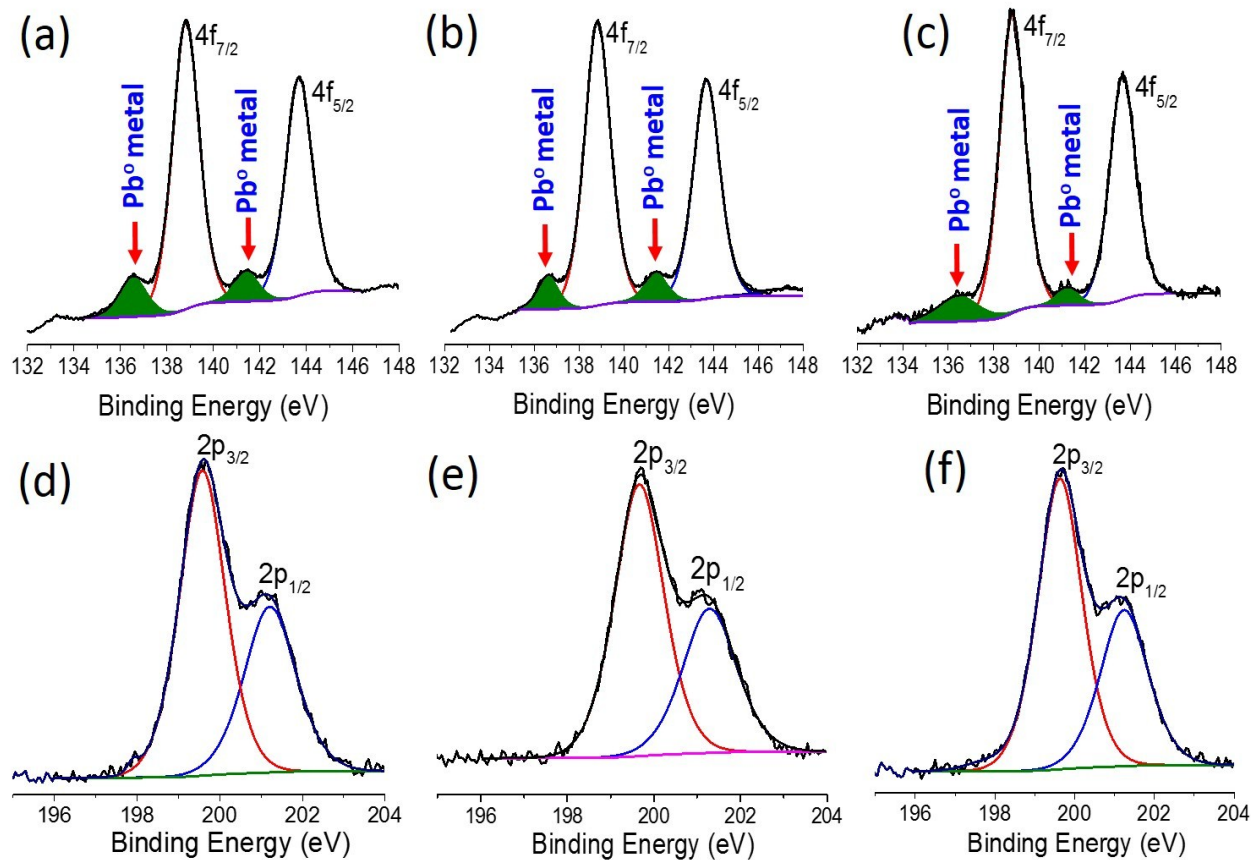

**Figure S19.** Pb 4f XPS spectra of spin-coated MACl and PbCl<sub>2</sub> a) on a Si/SiO<sub>2</sub> substrate with a further annealing at 130°C for MAPbCl<sub>3</sub> growth, and b) on a GO thin film (3-5 layers) at room temperature, c) after annealing at 130°C for MAPbCl<sub>3</sub> growth on GO indicating metallic lead (Pb<sup>0</sup>) bands at 136.9 eV and 141.8 eV. Cl 2p XPS spectra of spin-coated MACl and PbCl<sub>2</sub> d) on a Si/SiO<sub>2</sub> substrate with a further annealing at 130°C for MAPbCl<sub>3</sub> growth, and e) on a GO thin film (3-5 layers) at room temperature, f) after annealing at 130°C.

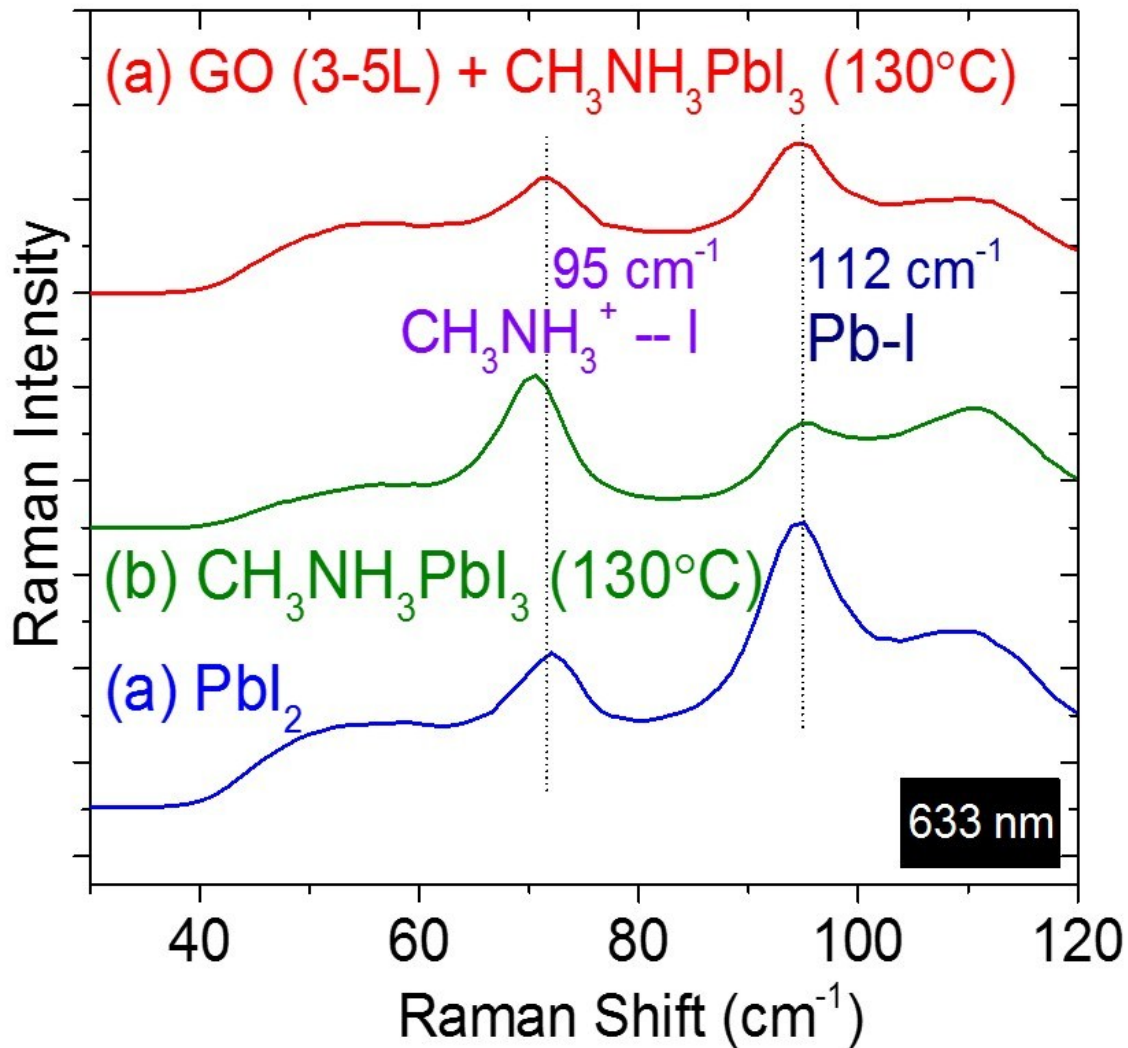

**Figure S20.** *In situ* micro Raman spectra of MAPbI<sub>3</sub> (CH<sub>3</sub>NH<sub>3</sub>PbI<sub>3</sub>) grown at 130°C from a 40 wt.% of DMF solution deposited a) on a GO (3-5L) thin film and b) on a Si/SiO<sub>2</sub> substrate. c) Raman spectrum of PbI<sub>2</sub> deposited on a Si/SiO<sub>2</sub> from a 40 wt.% of DMF solution at room temperature. Each spectrum is collected at 633 nm laser exposure.

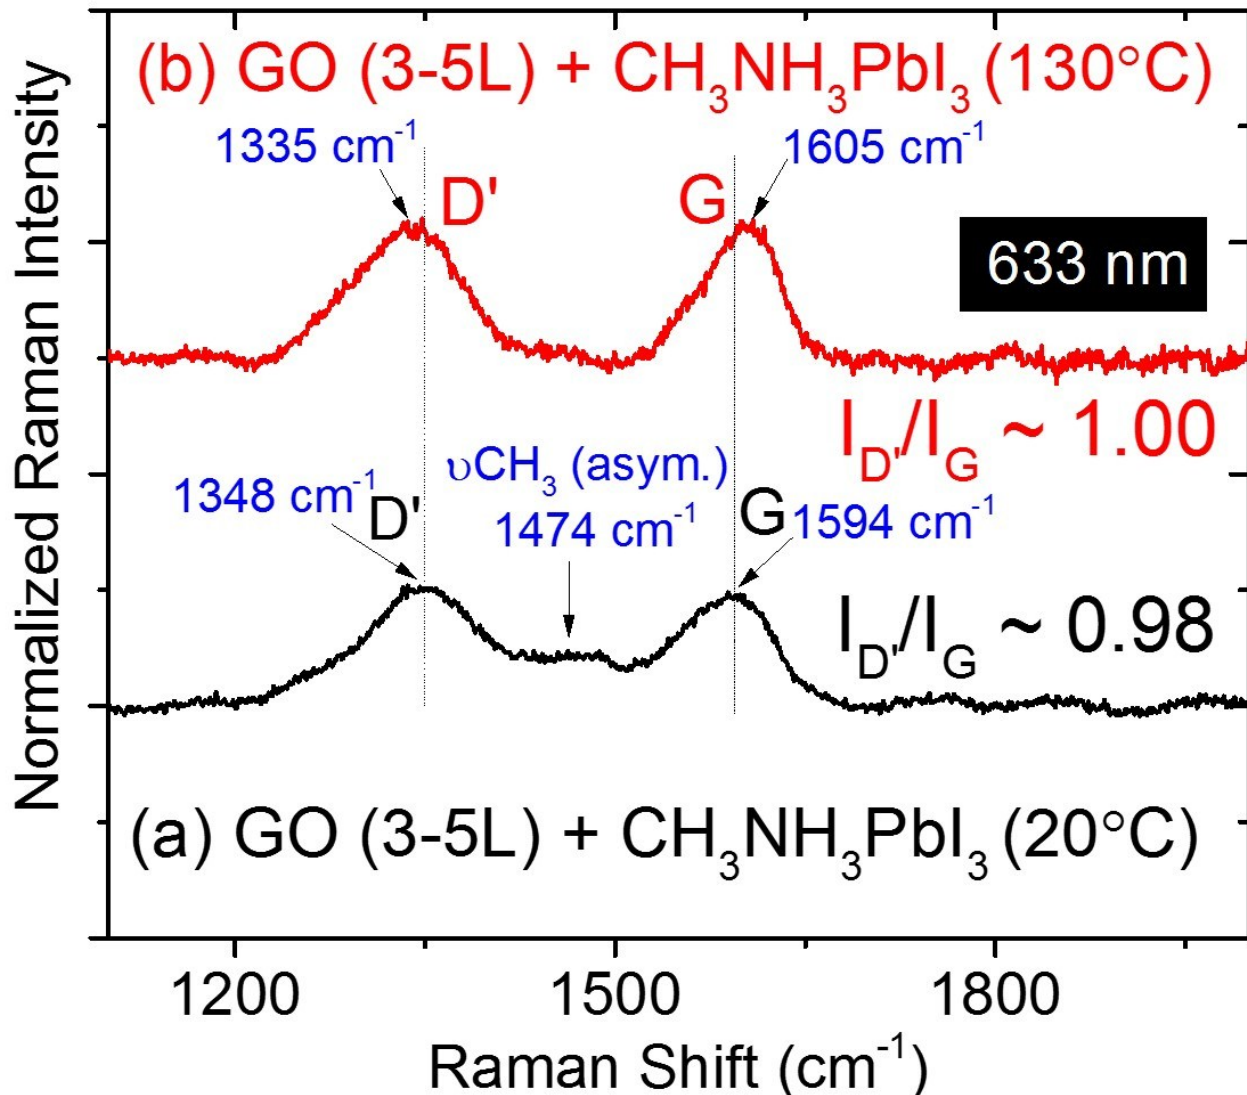

**Figure S21.** *In situ* micro Raman spectra of MAPbI<sub>3</sub> (CH<sub>3</sub>NH<sub>3</sub>PbI<sub>3</sub>) grown from a 40 wt.% of DMF solution deposited on a GO (3-5L) thin film a) at 130°C (red spectrum) and b) at room temperature (black spectrum). Each spectrum is collected at 633 nm laser exposure.

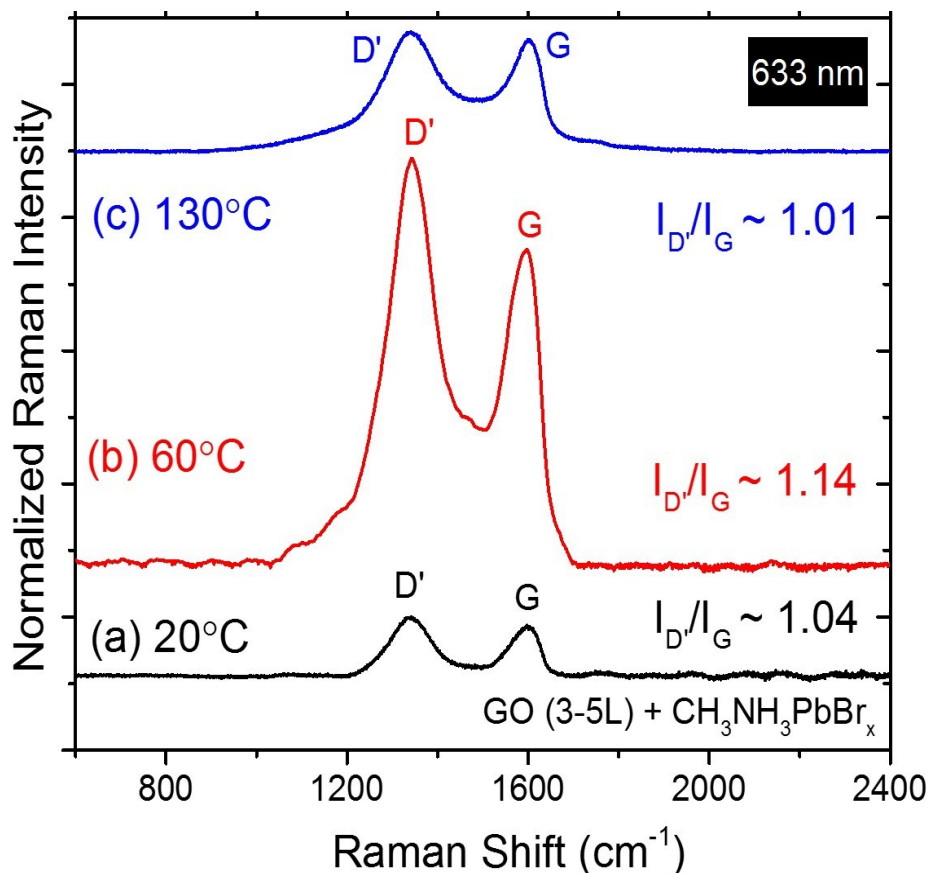

**Figure S22.** *In situ* micro Raman spectra of MAPbBr<sub>3</sub> (CH<sub>3</sub>NH<sub>3</sub>PbBr<sub>3</sub>) grown from a 40 wt.% of DMF solution deposited on a GO (3-5L) thin film a) at 20°C (black spectrum), b) at 60°C (red spectrum), and c) at 130°C (blue spectrum). Each spectrum is collected at 633 nm laser exposure.

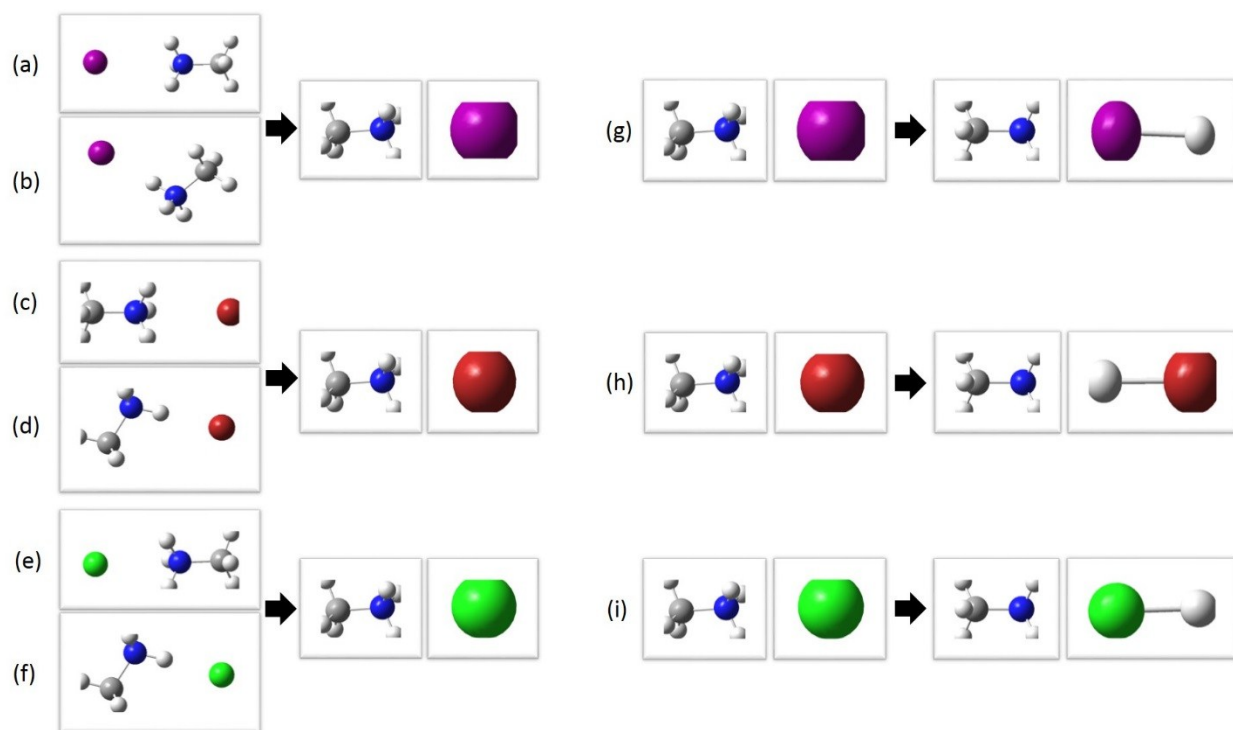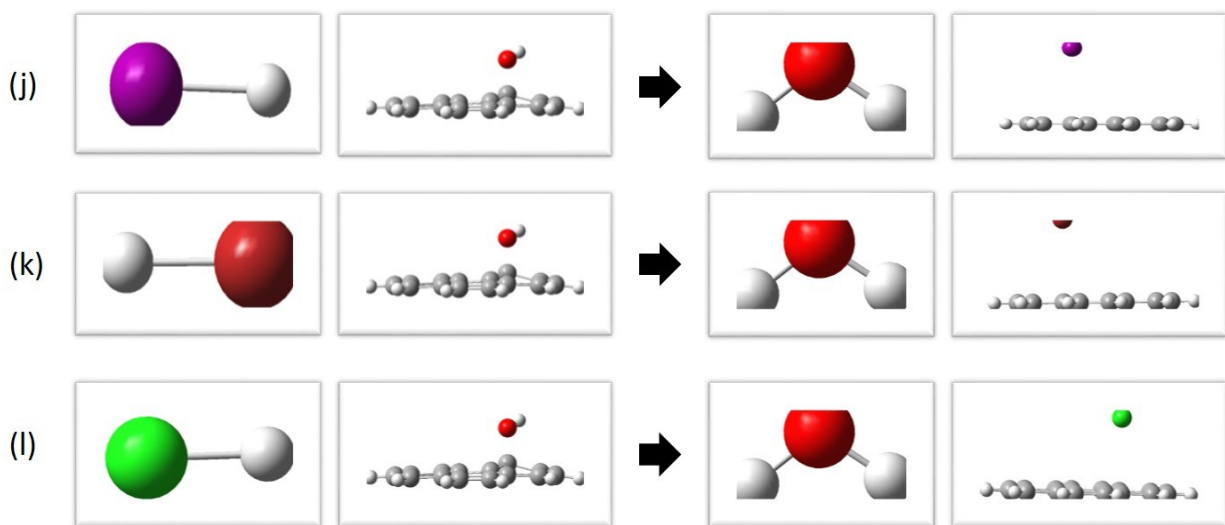

**Figure S23.** Atomic representation of chemical reactions for the dissociation and decomposition of the lead halide precursors given in Table 1.



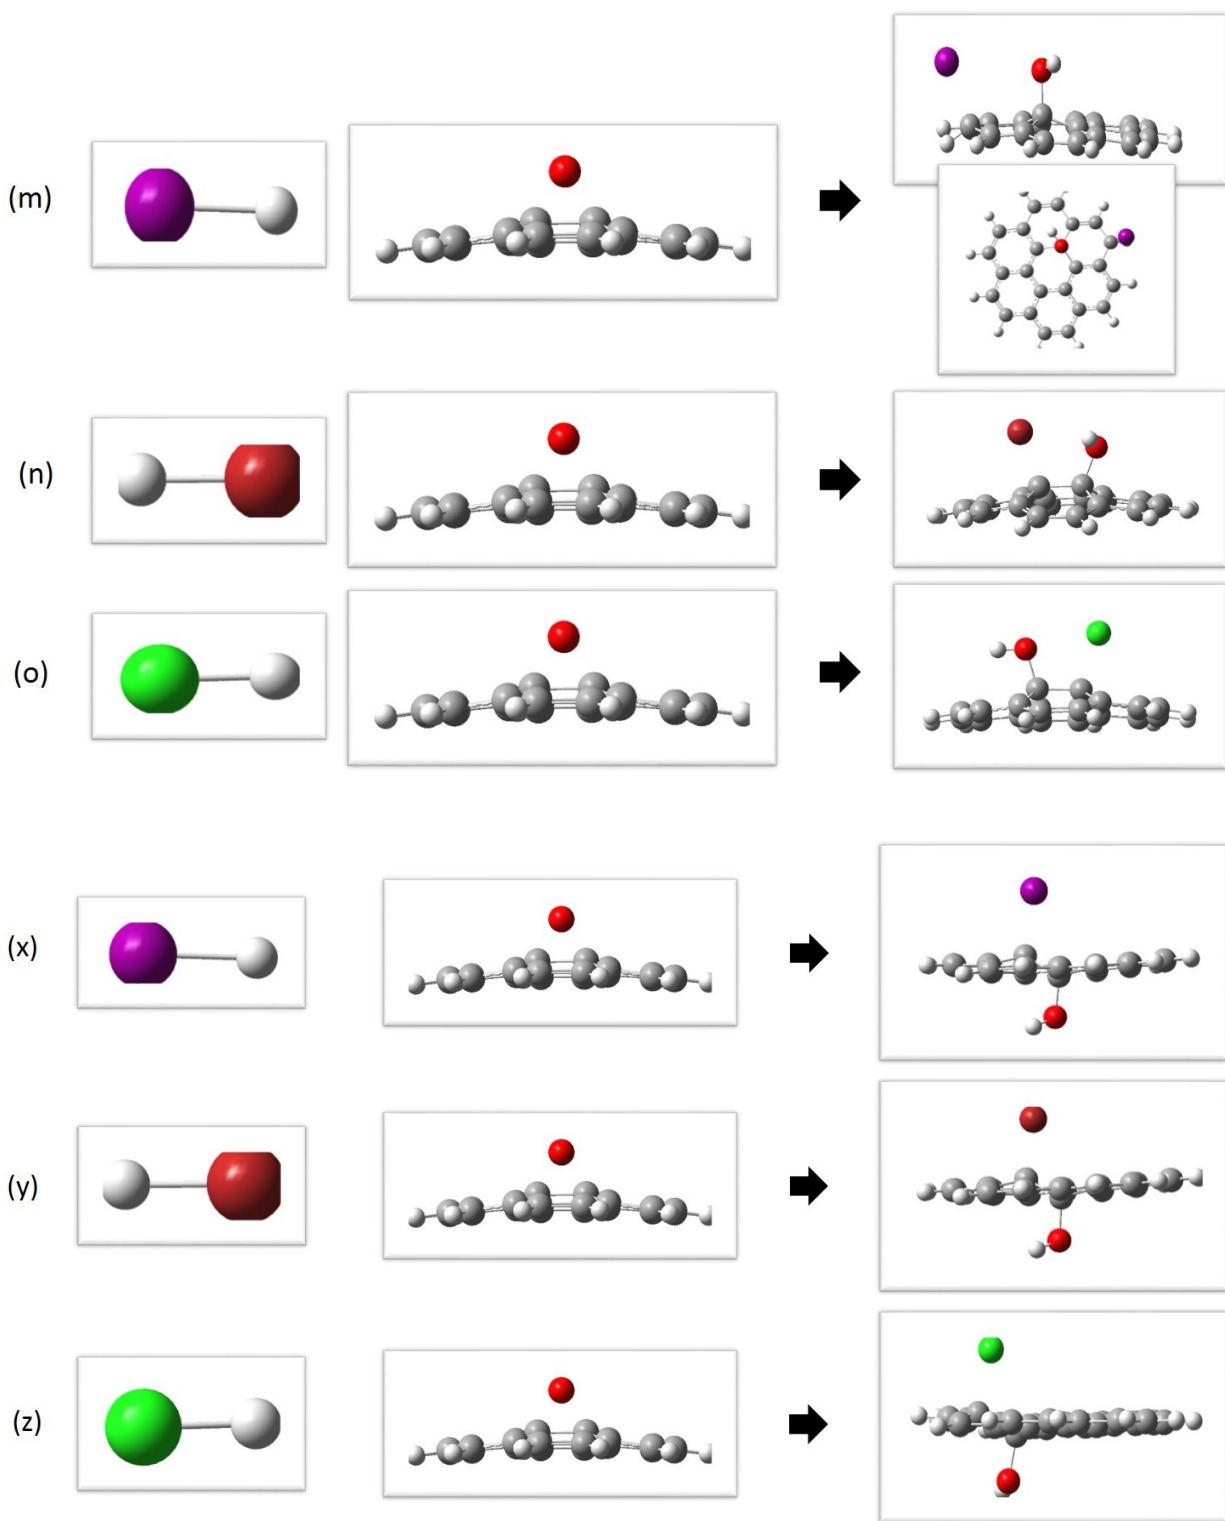

**Figure S24.** Atomic representation of chemical reactions for between the acid by-products and the oxygen groups of GO summarized in Table 1.

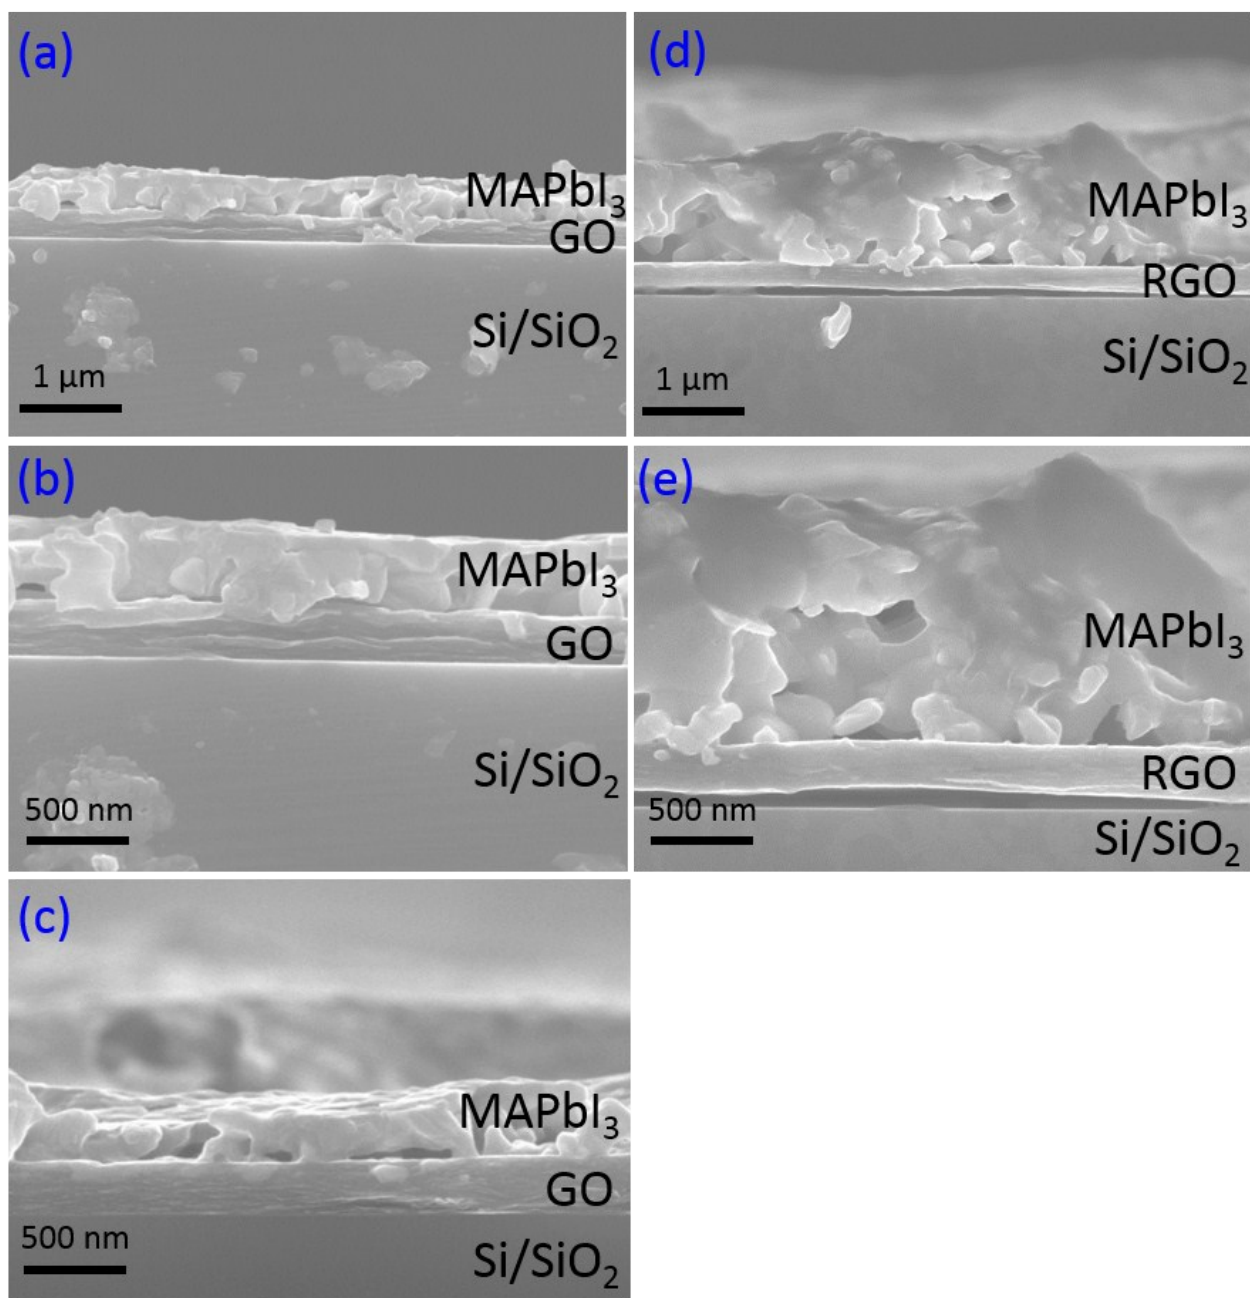

**Figure S25.** Cross-sectional SEM analysis of the GO/MAPbI<sub>3</sub> interface captured at the 20k (a) and 40k magnifications from different sections of the sample (b-c), and the RGO/MAPbI<sub>3</sub> interface at the 20k (d) and 40k (e) magnifications. The thickness of MAPbI<sub>3</sub> and GO/RGO is ~ 400-500 nm and ~200 nm, respectively.

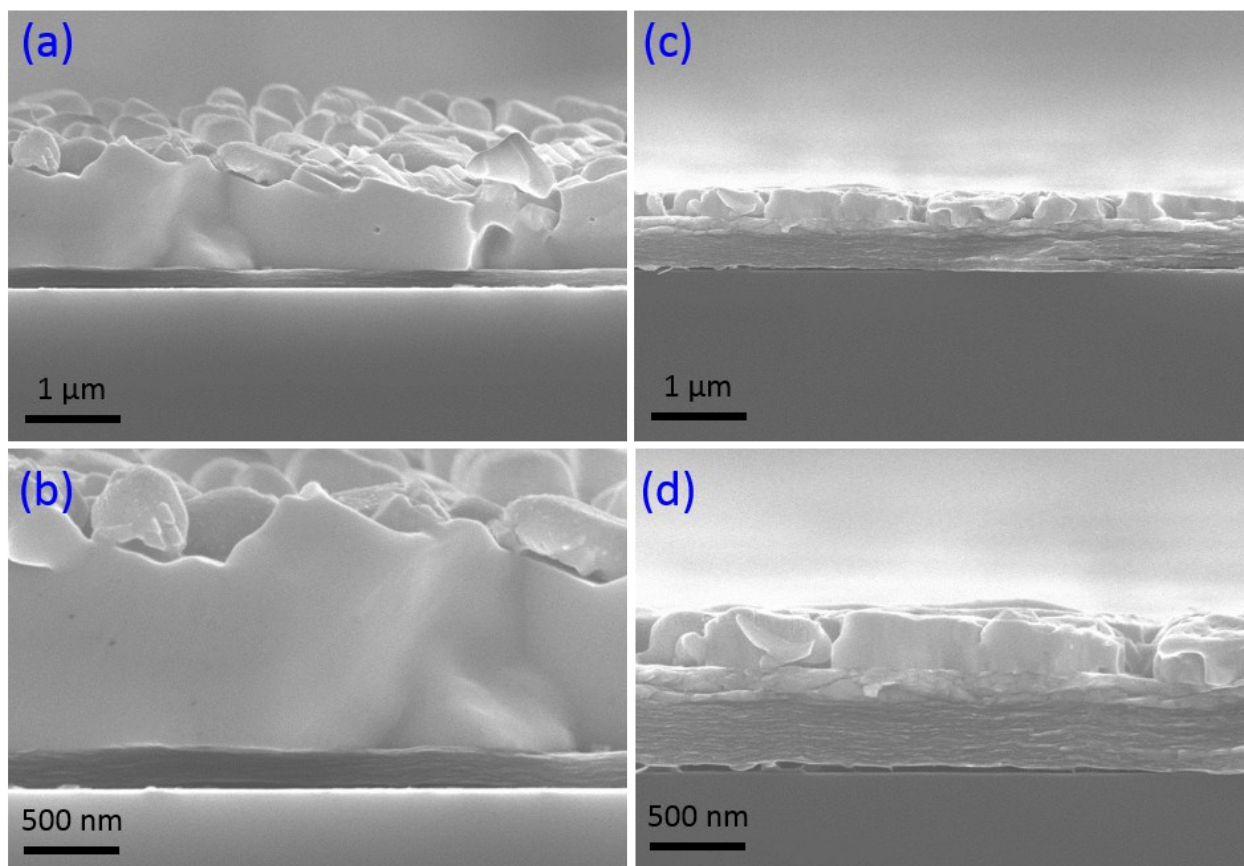

**Figure S26.** Cross-sectional SEM analysis of the GO/MAPbBr<sub>3</sub> interface captured at 20k (a) and 40k magnifications (b), and the RGO/MAPbI<sub>3</sub> interface at 20k (c) and 40k (f) magnifications. The thickness of MAPbBr<sub>3</sub> and GO/RGO is ~400-500 nm and ~200 nm, respectively.

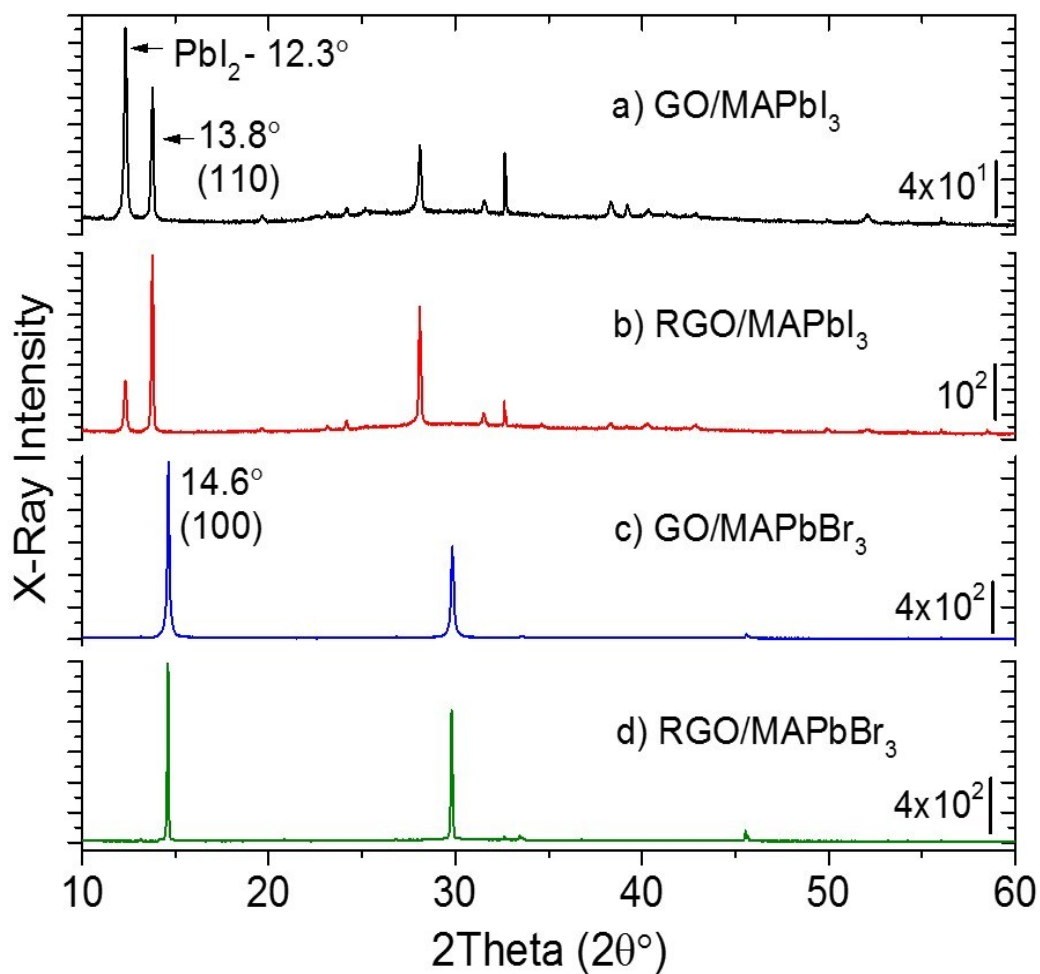

**Figure S27.** XRD analysis of the MAPbI<sub>3</sub> growth (130°C for 2 hours) on GO (a) and on RGO annealed at 200°C for 2 hours in nitrogen (b). XRD analysis of MAPbBr<sub>3</sub> growth (130°C for 2 hours) on GO (c), and on RGO (d). The thin films of GO and RGO are deposited on the Si/SiO<sub>2</sub> substrates.

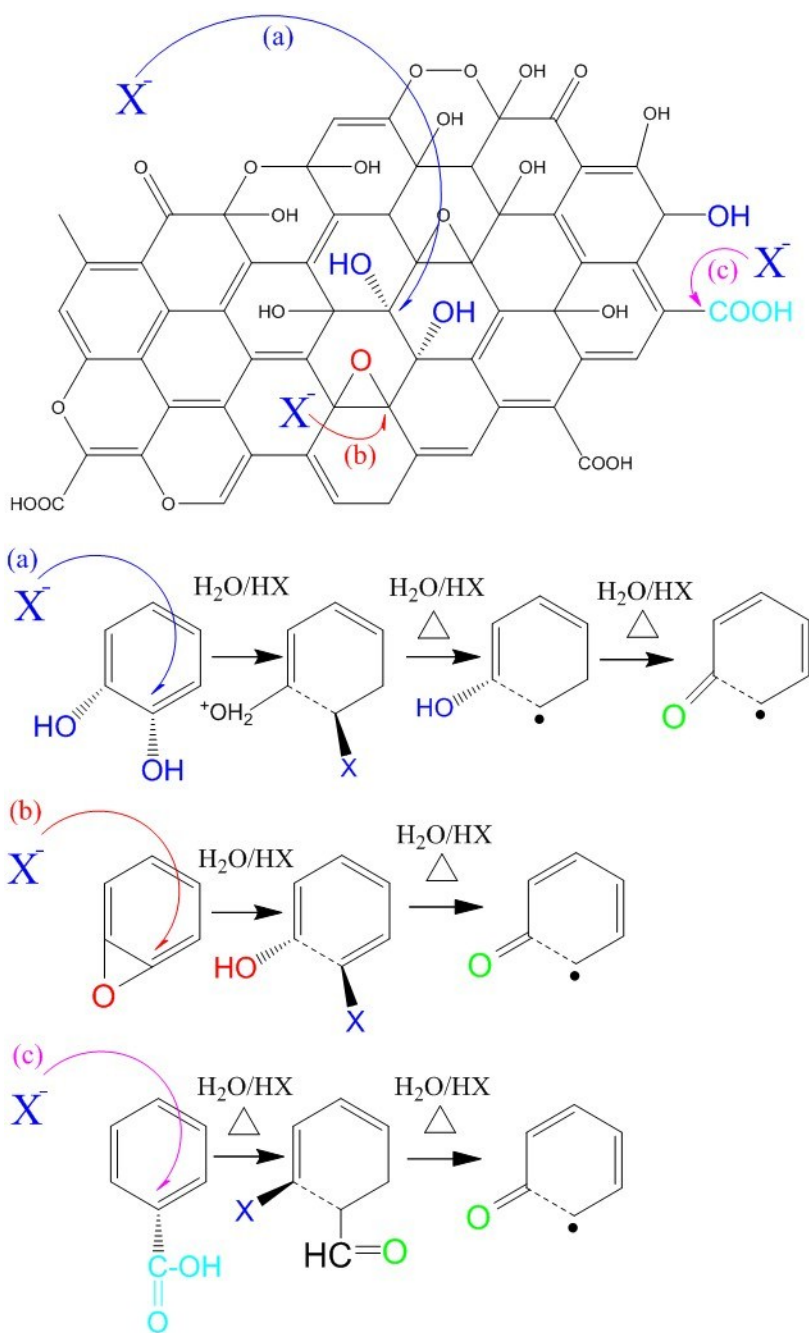

**Figure S28.** The proposed mechanism for the MAPbX<sub>3</sub> growth on GO for the removal of a) hydroxyls, b) epoxides, and c) carboxyls from GO. X corresponds to the halides (I, Br and Cl). The epoxides disappear for only MAPbBr<sub>3</sub> and MAPbCl<sub>3</sub> growth on GO at room temperature. Hydroxyls and carboxyls remove at elevated temperatures for MAPbI<sub>3</sub> growth on GO, which is included room temperature mechanism in (c) of MAPbBr<sub>3</sub> and MAPbCl<sub>3</sub>.

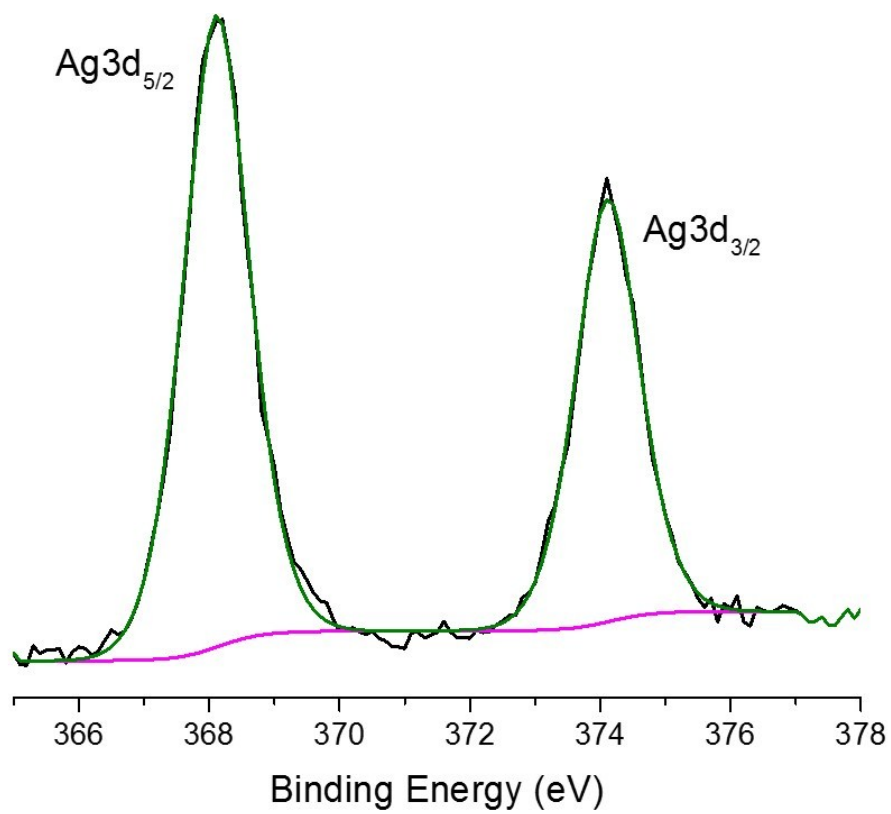

**Figure S29.** X-ray photoelectron spectroscopy (XPS) for Ag3d analysis for the peak calibration with the paste on the edges of the samples deposited on a Si/SiO<sub>2</sub> or on a GO thin film.
